# Supplementary material
Source: PubMed Central journal article supplement (PMC7382294)
Supplement: pnas.2002918117.sapp.pdf [file pnas.2002918117.sapp.pdf]

**Supplementary Information for  
Calibrating the co-evolution of Ediacaran life and environment**

Alan D. Rooney, Marjorie D. Cantine, Kristin D. Bergmann, Thomas H. Boag, James F. Busch,  
Erik A. Sperling, Justin V. Strauss

Alan D. Rooney and Marjori D. Cantine.

E-mail: [alan.rooney@yale.edu](mailto:alan.rooney@yale.edu) [mcantine@mit.edu](mailto:mcantine@mit.edu)

This PDF file includes:

Supplementary text

Figs. S1 to S3

Tables S1 to S3

Supplementary File references

## Supplementary Information Text

### Geological Setting: Oman

The Ediacaran Nafun Group of Oman is exposed in outcrop in the southern Huqf Desert and northern Oman Mountains (Al Hajar Mountains) and is extensively penetrated by drillcore in the South Oman Salt Basin and Huqf-Haushi High areas (Fig. S1). In the subsurface and Huqf Desert, the Nafun Group is exceptionally well-preserved and has not undergone significant metamorphism or burial. The sedimentology, stratigraphy, and geochemistry of the Nafun Group has been extensively studied (1-23), in part motivated by the presence of hydrocarbon resources and in part because its exceptional preservation offers the opportunity to study proxy records that have been obscured or obliterated in many other Ediacaran successions. Proxy records examined in Oman have included carbonate clumped isotopes (15), biomarkers (5-7, 12) and carbonate-associated sulphate (10, 11).

The Nafun Group overlies the Abu Mahara Group, which contains diamictites correlated with Cryogenian glaciations, and the Nafun Group's basal Hadash Formation (Fm) is correlated with the post-Marinoan cap carbonate globally. The Nafun Group is a mixed siliciclastic-carbonate deposit with two major cycles of siliciclastic-to-carbonate deposition. The lower cycle is represented by the Masirah Bay and Khufai formations, and the upper cycle by the Shuram and Buah formations. Both cycles are characterized by lithofacies assemblages consistent with a shallowing upwards pattern (15).

The Masirah Bay overlies the Hadash Fm, the Cryogenian Ghadir Manquil Fm, or the Halfayn volcanic suite depending on the location. The Masirah Bay Fm is dominantly siliciclastic, with shales, siltstones, and sandstones, though in it contains interbedded shales and dolomites near its top (16). Its upper contact with the Khufai Fm is transitional, from thinly bedded shales and dolomites into continuous carbonate (21). The Khufai Fm contains both limestones and dolomites and was deposited in a ramp setting (11, 21). Fetid carbonates are common, as are grainstones and silicification. The onset of the Shuram CIE is captured in the uppermost Khufai Fm, and its contact with the Shuram Fm in the Huqf Desert is marked by a laterally continuous oolite on which cauliflower stromatolites nucleated (2; Table S1). The transition to the Shuram Fm is also marked by a sharp shift to siliclastic siltstone with occasional interbedded limestones, which increase in abundance moving upsection (2, 9, 21). Shuram Fm limestones often contain ooids and edgewise conglomerates and siltstones in the Huqf Desert typically contain hummocky and swaley cross

stratification (9, 21). Full recovery to positive  $\delta^{13}\text{C}$  values occurs in the overlying, carbonate-dominated Buah Fm (2, 3, 19, 21, 23; Fig. S2; Table S1). In deep-water sections, a thick silicilyte (rock containing >90% cryptocrystalline silica) occurs in the upper Buah Fm. An unconformity between the Buah Fm and the overlying carbonates and evaporites of the Ara Group is often seen in the subsurface, while in the Oman Mountains, the Buah is overlain by the volcanoclastics of the Fara Fm (16).

Radioisotopic constraints on the Nafun Group are limited to minimum depositional ages derived from detrital zircons (17). Extensive dating of volcanoclastic and ash units in the overlying Ara Group from the Oman Mountains and South Oman Salt Basin have yielded latest Ediacaran ages (17). Fossils of Ediacaran biota are not known from any Nafun Group stratigraphy, but *Cloudina* and *Namacalathus* are reported in Ara Group drillcore (20).

Two drillcores, drilled by Petroleum Development Oman in the last decade, sample the deepest water environments of the South Oman Salt Basin (Fig. S1). We refer to them as Well L and Well M. Carbon isotope data, sedimentology, and gamma ray data guide the correlation of these cores both to other subsurface wells and to outcrop in the Huqf Desert and Oman Mountains. Correlation of Wells L and M to Thamoud-6, a well that has been previously described is shown in Figs. S1, S2), with stratigraphic location of Re-Os samples sampled for this study. Organic-rich shale intervals were targeted for Re-Os geochronology. Sample suites comprise up to 9 subsamples taken within intervals up to 1.4 meters in total thickness.

#### Geological Setting: NW Canada

In the Wernecke and Ogilvie Mountains of Yukon, Canada, Neoproterozoic rocks of the Windermere Supergroup (ca. 780-540 Ma) consist of a ca. 6 km thick mixed carbonate-siliciclastic succession deposited along the northwestern margin of Laurentia (24-26). Ediacaran strata of the Wernecke Mountains comprise the recently formalized Rackla Group (27), which is composed of the Sheepbed, Nadaleen, Gametrail, Blueflower, Algae, and Risky formations (24, 25, 27-30; Fig. S3). The ca. 632 Ma Sheepbed Formation locally overlies glaciogenic diamictite (Rapitan Group) and cap carbonate (Ravenstroat Formation) of the Cryogenian Marinoan glaciation (27, 28, 31-34). These strata are overlain by mixed siliciclastic and carbonate strata of the Nadaleen Formation, which locally contains the Ediacaran macrofossil *Aspidella* and are characterized by highly enriched  $\delta^{13}\text{C}_{\text{carb}}$  values up to +9‰ (ref. 27). The overlying Gametrail

Formation contains highly depleted  $\delta_{13}\text{C}_{\text{carb}}$  values down to -13‰ that have been correlated globally with the Shuram CIE (27, 28; Table S1); this unit records an abrupt return to positive  $\delta_{13}\text{C}_{\text{carb}}$  values near the top of the formation and its contact with the overlying Blueflower Formation (Fig. 1; Extended Data Fig. 3). The Gametrail Formation is overlain by mixed siliciclastic and carbonate strata of the fossiliferous Blueflower, Algae, and Risky formations, the latter of which lies at or just below the Ediacaran-Cambrian boundary (25, 29, 35-37).

Ediacaran–Cambrian strata of the Ogilvie Mountains comprise a series of informal map units labeled PH3, PH4, and PH5 (28, 38-41; Fig. S3). Units PH3 and PH4 were previously correlated with the informal “upper group” (28), but recent formalization of the Rackla Group suggests these units instead belong within this newer lithostratigraphic unit (27). Unit PH3 consists predominantly of black shale and mudstone that directly overlies an unnamed Cryogenian glacial deposit and cap carbonate pair belonging to the ca. 635 Ma Marinoan glaciation (28, 39). This is succeeded by unit PH4, which is composed primarily of hummocky cross-stratified dolostone, silty dolostone, and rare dolerudstone with interbedded black shale and concretionary limestone near its top. These strata record highly depleted  $\delta_{13}\text{C}_{\text{carb}}$  values down to -9‰, which have previously been correlated with the Shuram CIE (27; Table S1). The concretionary limestone unit at the top of unit PH4 has been loosely correlated with the Blueflower Formation and records a return to enriched  $\delta_{13}\text{C}_{\text{carb}}$  values (Fig. S3). Locally, units PH3 and PH4 are truncated by an angular unconformity beneath unit PH5, which is composed of siltstone and sandstone that contain diagnostic early-middle Cambrian trace fossils including *Skolithos*, *Cruziana*, and *Rusophycus* (38).

#### Re-Os geochronology

All radioisotopic analyses were performed at the Yale University Metal Geochemistry and Geochronology Center. Weathered surfaces were removed with a diamond-encrusted rock saw and samples were then hand-polished using a diamond-encrusted polishing pad to remove cutting marks and eliminate any potential for contamination from the saw blade. The samples were dried overnight at ~40 °C and then crushed to a fine (~30  $\mu\text{m}$ ) powder in a SPEX 8500 Shatterbox using a zirconium ceramic grinding container and puck in order to homogenize any Re and Os heterogeneity present in the samples (42). The Re and Os isotopic abundances and compositions were determined following methodologies previously described (43, 44).

Between 0.15 and 1 g of sample was digested and equilibrated in 8 ml of  $\text{CrVI O}_3\text{-H}_2\text{SO}_4$  together with a mixed tracer (spike) solution of  $^{190}\text{Os}$  and  $^{185}\text{Re}$  in carius tubes at 220 °C for 48 hours. Rhenium and Os were isolated and purified using solvent extraction ( $\text{NaOH}$ ,  $(\text{CH}_3)_2\text{CO}$ , and  $\text{CHCl}_3$ ), micro-distillation and anion column chromatography methods, as outlined previously (45, 46). The  $\text{CrVI O}_3\text{-H}_2\text{SO}_4$  digestion method was employed as it has been shown to preferentially liberate hydrogenous Re and Os yielding more accurate and precise age determinations (47, 48). Total procedural blanks during this study were  $88.0 \pm 2.1$  pg and  $0.18 \pm 0.07$  pg for Re and Os respectively, with an average  $^{187}\text{Os}/^{188}\text{Os}$  value of  $0.25 \pm 0.05$  ( $1\sigma$ ,  $n = 4$ ). The major source (>90%) of Re blank is from the  $\text{CrVI O}_3\text{-H}_2\text{SO}_4$  solution.

Isotopic measurements were performed using a ThermoFisher TRITON PLUS thermal ionization mass spectrometer in negative mode at the Yale University via static Faraday collection for Re and ion-counting using a secondary electron multiplier in peak-hopping mode for Os (49, 50). The Os samples were loaded onto 99.995% Pt wire (H-Cross, NJ) in 9 N HBr and covered with a saturated solution of  $\text{Ba}(\text{OH})_2$  in 0.1 N NaOH as activator and analyzed as oxides of Os. Interference of  $^{187}\text{ReO}_3$  on  $^{187}\text{OsO}_3$  was corrected by the measured intensity of  $^{185}\text{ReO}_3$ . Mass fractionation was corrected with  $^{192}\text{Os}/^{188}\text{Os} = 3.0826$ , using the exponential fractional law. Measurement quality was monitored by repeated measurement of the DROsS standard solution, which yielded  $^{187}\text{Os}/^{188}\text{Os}$  values of  $0.16091 \pm 0.00015$  ( $n=51$ ) over the course of the measurement campaign, in good agreement with values obtained by other laboratories (51, 52). The Yale University Re standard solution (measured on faraday cups during analytical sessions) yields an average  $^{185}\text{Re}/^{187}\text{Re}$  value of  $0.59783 \pm 0.0006$ ;  $1\sigma$ ,  $n = 17$ ), which is indistinguishable, within uncertainty previously published values (53). The measured difference in  $^{185}\text{Re}/^{187}\text{Re}$  values for the Re solution and the accepted  $^{185}\text{Re}/^{187}\text{Re}$  value of 0.59738; previously published values (53) are used to correct the Re sample data for instrument mass fractionation and blank and spike contributions.

Uncertainties for  $^{187}\text{Re}/^{188}\text{Os}$  and  $^{187}\text{Os}/^{188}\text{Os}$  are determined by error propagation of uncertainties in Re and Os mass spectrometry measurements, blank abundances and isotopic compositions, spike calibrations, and reproducibility of standard Re and Os isotopic values. The Re-Os isotopic data,  $2\sigma$  calculated uncertainties for  $^{187}\text{Re}/^{188}\text{Os}$  and  $^{187}\text{Os}/^{188}\text{Os}$ , and the associated error correlation function ( $\rho$ ) are regressed to yield a Re-Os date using Isoplot V. 4.15 with the  $\lambda$   $^{187}\text{Re}$  constant of  $1.666 \times 10^{-11}\text{a}^{-1}$  (54-56). Elemental concentrations and isotopic compositions

for the Re-Os geochronology samples are listed in Table S2. All samples display enrichments above average crustal values with Re abundances ranging from 0.64 to 245.1 ng/g and Os abundances from 56 to 4703 pg/g.

### Carbon and Oxygen Isotope Geochemistry

Carbonate rock samples from northwestern Canada were analyzed at both Dartmouth College and the Yale Analytical and Stable Isotope Center. 0.1-0.5 kg samples of limestone and dolostone were collected approximately every m throughout detailed measured stratigraphic sections and targeted to avoid obvious fracturing or veining. The samples were then slabbed perpendicular to bedding using a lapidary saw and ~ 5-10 mg of powder was drilled from individual laminations using a drill press with a dental carbide drill bit. Carbonate powders analyzed at Dartmouth College (JB1704, J1711, JB1707, T1701, J1713, JB1801) were reacted with phosphoric acid ( $H_3PO_4$ ) at 70°C on a Gasbench II preparation device attached to a ThermoFinnigan DeltaPlus XL continuous flow isotope ratio mass spectrometer.  $\delta_{13}C_{carb}$  and  $\delta_{18}O_{carb}$  were measured simultaneously and isotopic data are reported in standard delta notation as the per mil difference from VPDB (Vienna Pee Dee Belemnite). Precision and accuracy were monitored by running a total of 12 standards for every 76 samples using 11:3 sample/standard bracketing. The standard set includes two external standards (NBS-18 and Elemental Microanalysis (EM) Carrara Marble), as well as an internal marble standard. Samples are measured relative to an internal  $CO_2$  gas standard and then converted to the VPDB scale using the known composition of NBS-18 ( $\delta_{13}C = -5.01$ ;  $\delta_{18}O = -23.20$ ) and the EM-Carrara Marble ( $\delta_{13}C_{carb} = 2.10$ ;  $\delta_{18}O_{carb} = -2.01$ ). Measured precision was 0.1-0.15‰ ( $1\sigma$ ) for  $\delta_{13}C_{carb}$  and 0.15-0.2‰ ( $1\sigma$ ) for  $\delta_{18}O_{carb}$ . Samples run at the Yale Analytical and Stable Isotopic Center (J1719) followed an identical procedure using a KIEL carbonate preparation device connected to a ThermoFinnigan MAT 253. The standard set includes the MERC ( $\delta_{13}C = -48.96$ ;  $\delta_{18}O = -16.48$ ), PX ( $\delta_{13}C_{carb} = 2.25$ ;  $\delta_{18}O_{carb} = -1.79$ ), and YM ( $\delta_{13}C_{carb} = -1.59$ ;  $\delta_{18}O_{carb} = -6.03$ ) standards which were calibrated against the NIBS 19, NBS 18, and LSVEC international standards on the VPDB scale. Internal precision was reported as 0.1-0.15‰ ( $1\sigma$ ) for  $\delta_{13}C_{carb}$  and 0.1-0.15‰ ( $1\sigma$ ) for  $\delta_{18}O_{carb}$ .

**Fig. S1:** Geological map of Oman, modified after published work (15, 16). Approximate locations of Wells L and M shown. Stratigraphic and chemostratigraphic overview of Wells L and M, with sampled horizons indicated.

**Fig. S2:** Lithostratigraphic and chemostratigraphic data for well Thamoud-6 with stratigraphic positions of samples from Well L and Well M shown. Formation boundaries follow Petroleum Development Oman's 2019 revision of stratigraphy. Recovery from the Shuram Excursion occurs within the Buah Fm.

**Fig. S3:** Geological map and detailed measured sections from Ediacaran strata in the Ogilvie and Wernecke Mountains, Yukon, Canada. The inset map shows the location of the measured sections in the main figure where NWT–Northwest Territories. Measured sections display main lithofacies and carbon isotope chemostratigraphy of the Rackla Group modified following published work (27, 28). The starred locations display the stratigraphic position of the sampled horizons.

**Table S1:**  $\delta_{13}\text{C}_{\text{carb}}$  isotope data were compiled from the literature from globally distributed successions (57-61). Published geochronological constraints and  $\delta_{13}\text{C}_{\text{carb}}$  chemostratigraphy were used to develop an age model.

**Table S2:** Rhenium and Os elemental abundance and isotopic composition data for isochron regressions. Uncertainties are given as  $2\sigma$  for  $^{187}\text{Re}/^{188}\text{Os}$  and  $^{187}\text{Os}/^{188}\text{Os}$  and  $^{192}\text{Os}$ . The uncertainty includes the  $2\sigma$  uncertainty for mass spectrometer analysis plus uncertainties for Os blank abundance and isotopic composition. (a)  $\rho$  is the associated error correlation (55). (b)  $\text{Os}_i$  = initial  $^{187}\text{Os}/^{188}\text{Os}$  isotope ratio calculated at 578, 567, 575, 562 and 574 Ma.

**Table S3:** In addition to ages from this work, some ages used for the construction of Figure 3 are from previously published work (17, 31, 62-66). Ages published before 2012 are as recalculated (67); ages are color-coded to their region of origin. All uncertainties include relevant decay constant uncertainties. The \* indicates U-Pb zircon chemical abrasion isotope dilution thermal ionization mass spectrometry (CA-ID-TIMS) age; † indicates U-Pb zircon Sensitive High-

Resolution Ion Microprobe (SHRIMP) age; ‡ indicates Re-Os organic-rich rock age. Ages from this study are bolded.

### Supplementary Information References

1. Fike, D. A., Grotzinger, J. P., Pratt, L. M. & Summons, R. E. Oxidation of the Ediacaran ocean. *Nature* **444**, 744–747 (2006).
2. Le Guerroué, E., Allen, P. A. & Cozzi, A. Chemostratigraphic and sedimentological framework of the largest negative carbon isotopic excursion in earth history: The neoproterozoic Shuram formation (Nafun Group, Oman). *Precambrian Res.* **146**, 68–92 (2006).
3. Cozzi, A., Allen, P. A. & Grotzinger, J. P. Understanding carbonate ramp dynamics using  $\delta^{13}\text{C}$  profiles: Examples from the Neoproterozoic Buah Formation of Oman. *Terra Nov.* **16**, 62–67 (2004).
4. Le Guerroué, E., Allen, P. A. & Cozzi, A. Parasequence development in the Ediacaran Shuram Formation (Nafun Group, Oman): High-resolution stratigraphic test for primary origin of negative carbon isotopic ratios. *Basin Res.* **18**, 205–219 (2006).
5. Grosjean, E., Love, G. D., Stalvies, C., Fike, D. A. & Summons, R. E. Origin of petroleum in the Neoproterozoic-Cambrian South Oman Salt Basin. *Org. Geochem.* **40**, 87–110 (2009).
6. Grosjean, E., Love, G. D., Kelly, A. E., Taylor, P. N. & Summons, R. E. Geochemical evidence for an Early Cambrian origin of the ‘Q’ oils and some condensates from north Oman. *Org. Geochem.* **45**, 77–90 (2012).
7. Love, G. D. *et al.* Fossil steroids record the appearance of Demospongiae during the Cryogenian period. *Nature* **457**, 718–21 (2009).
8. Nicholas, C. J. & Gold, S. E. P. Ediacaran – Cambrian Sirab Formation of the Al Huqf region, Sultanate of Oman. *GeoArabia* **17**, 49–98 (2012).
9. Bergmann, K. D. Constraints on the carbon cycle and climate during the early evolution of animals. (California Institute of Technology, 2013).
10. Osburn, M. R., Owens, J., Bergmann, K. D. & Lyons, T. W. Dynamic changes in sulfate sulfur isotopes preceding the Ediacaran Shuram Excursion. *Geochim. Cosmochim. Acta* (2015).
11. Osburn, M., Grotzinger, J. & Bergmann, K. Facies, stratigraphy, and evolution of a middle ediacaran carbonate ramp: Khufai formation, sultanate of Oman. *Am. Assoc. Pet. Geol. Bull.* **98**, 1631–1667 (2014).
12. Lee, C., Love, G. D., Fischer, W. W., Grotzinger, J. P. & Halverson, G. P. Marine organic matter cycling during the Ediacaran Shuram excursion. *Geology* **43**, 1103–1106 (2015).
13. Le Guerroué, E. Duration and synchronicity of the largest negative carbon isotope excursion on Earth: The Shuram/Wonoka anomaly. *Comptes Rendus - Geosci.* **342**, 204–214 (2010).
14. Stolper, D. A. *et al.* Paleoecology and paleoceanography of the Athel silicilyte, Ediacaran-Cambrian boundary, Sultanate of Oman. *Geobiology* **15**, 401–426 (2017).
15. Bergmann, K. D., Al Balushi, S. A. K., Mackey, T. J., Grotzinger, J. P. & Eiler, J. M. A 600-Million-Year Carbonate Clumped-Isotope Record from the Sultanate of Oman. *J. Sediment. Res.* **88**, 960–979 (2018).



16. Forbes, G. A., Jansen, H. S. M. & Schreurs, J. *Lexicon of Oman: Subsurface Stratigraphy: reference guide to the stratigraphy of Oman's hydrocarbon basins*. (Gulf PetroLink, 2010).
17. Bowring, S. A. *et al.* Geochronologic constraints on the chronostratigraphic framework of the neoproterozoic Huqf Supergroup, Sultanate of Oman. *Am. J. Sci.* **307**, 1097–1145 (2007).
18. Allen, P. A. The Huqf Supergroup of Oman: Basin development and context for Neoproterozoic glaciation. *Earth-Science Rev.* **84**, 139–185 (2007).
19. Burns, S. J. & Matter, A. Carbon isotopic record of the latest Proterozoic from Oman. *Eclogae Geol. Helv.* **86**, 595–607 (1993).
20. Amthor, J. E. *et al.* Extinction of Cloudina and Namacalathus at the Precambrian-Cambrian boundary in Oman. *Geology* **31**, 431–434 (2003).
21. McCarron, M. E. G. The sedimentology and chemostratigraphy of the Nafun Group, Huqf Supergroup, Oman. (Oxford University, 1999).
22. Leather, J., Allen, P. A., Brasier, M. D. & Cozzi, A. Neoproterozoic snowball Earth under scrutiny: Evidence from the Fiq glaciation of Oman. *Geology* **30**, 891–894 (2002).
23. Cozzi, A., Grotzinger, J. P. & Allen, P. A. Evolution of a terminal Neoproterozoic carbonate ramp system (Buah Formation, Sultanate of Oman): Effects of basement paleotopography. *Bull. Geol. Soc. Am.* **116**, 1367–1384 (2004).
24. Gabrielse, H., Blusson, S. L. & Roddick, J. A. *Geology of Flat River, Glacier Lake, and Wrigley Lake map-areas, District of Mackenzie and Yukon Territory*. (Dept. of Energy, Mines, and Resources, 1972).
25. Narbonne, G. M. & Aitken, J. D. Neoproterozoic of the Mackenzie Mountains, northwest Canada. *Precambrian Res.* **73**, 101–121 (1995).
26. Strauss, J. V. *et al.* *Geological map of the Coal Creek inlier, Ogilvie Mountains (NTS 116B/10-15 and 116C/9, 16)*. (2014).
27. Moynihan, D. P., Strauss, J. V., Nelson, L. L. & Padget, C. D. Upper Windermere Supergroup and the transition from rifting to continent-margin sedimentation, Nadaleen River area, northern Canadian Cordillera. *GSA Bull.* 1–29 (2019). doi:10.1130/b32039.1
28. Macdonald, F. A. *et al.* The stratigraphic relationship between the Shuram carbon isotope excursion, the oxygenation of Neoproterozoic oceans, and the first appearance of the Ediacara biota and bilaterian trace fossils in northwestern Canada. *Chem. Geol.* **362**, 250–272 (2013).
29. Aitken, J. D. *Uppermost Proterozoic formations in central Mackenzie Mountains, Northwest Territories*. **368**, (1989).
30. Cecile, M. P. *Geology of the northeastern Niddery Lake map area, east-central Yukon and adjacent Northwest Territories*. **553**, (2000).
31. Rooney, A. D., Strauss, J. V., Brandon, A. D. & Macdonald, F. A. A Cryogenian chronology: Two long-lasting synchronous neoproterozoic glaciations. *Geology* **43**, 459–462 (2015).
32. Aitken, J. D. Two Late Proterozoic glaciations, Mackenzie Mountains, northwestern Canada. *Geology* **19**, 445–448 (1991).
33. Hoffman, P. F., Kaufman, A. J., Halverson, G. P. & Schrag, D. P. A Neoproterozoic Snowball Earth. *Science (80- )*. **281**, 1342–1346 (1998).
34. James, N. P., Narbonne, G. M. & Kyser, T. K. Late Neoproterozoic cap carbonates: Mackenzie Mountains, northwestern Canada: precipitation and global glacial meltdown.

- Can. J. Earth Sci.* **38**, 1229–1262 (2001).
35. Narbonne, G. M., Kaufman, A. J. & Knoll, A. H. Integrated chemostratigraphy and biostratigraphy of the Windermere Supergroup, northwestern Canada: implications for Neoproterozoic correlations and the early evolution of animals. *Geol. Soc. Am. Bull.* **106**, 1281–1292 (1994).
  36. Kaufman, A. J., Knoll, A. H. & Narbonne, G. M. Isotopes, ice ages, and terminal Proterozoic earth history. *Proc. Natl. Acad. Sci.* **94**, 6600–6605 (1997).
  37. Carbone, C. A. & Narbonne, G. M. When life got smart: the evolution of behavioral complexity through the Ediacaran and early Cambrian of NW Canada. *J. Paleontol.* **88**, 309–330 (2014).
  38. Mustard, P. S., Donaldson, J. A. & Thompson, R. I. Trace fossils and stratigraphy of the Precambrian–Cambrian boundary sequence, upper Harper group, Ogilvie Mountains, Yukon. in *Current Research, Part E: Geological Survey of Canada Paper* 197–203 (1988).
  39. Strauss, J. V., Rooney, A. D., MacDonald, F. A., Brandon, A. D. & Knoll, A. H. 740 Ma vase-shaped microfossils from Yukon, Canada: Implications for neoproterozoic chronology and biostratigraphy. *Geology* **42**, 659–662 (2014).
  40. Thompson, R. I., Mustard, P. S. & Roots. *Geology of the Dawson map area (NTS116B, C)(northeast of Tintina trench)*. (1994).
  41. Mustard, P. S. & Roots, C. F. *Rift-related volcanism, sedimentation, and tectonic setting of the Mount Harper Group, Ogilvie Mountains, Yukon Territory*. (1997).
  42. Kendall, B., Creaser, R. A. & Selby, D. 187Re–187Os geochronology of Precambrian organic-rich sedimentary rocks. in *Global Neoproterozoic Petroleum Systems: The Emerging Potential in North Africa* (eds. Craig, J., Thurow, J., Thusu, B., Whitman, A. & Abutarruma, Y.) 85–107 (Geological Society, 2009).
  43. Selby, D. & Creaser, R. A. Re–Os geochronology of organic rich sediments: An evaluation of organic matter analysis methods. *Chem. Geol.* **200**, 225–240 (2003).
  44. Cumming, V. M., Poulton, S. W., Rooney, A. D. & Selby, D. Anoxia in the terrestrial environment during the late Mesoproterozoic. *Geology* **41**, 583–586 (2013).
  45. Cohen, A. S. & Waters, F. G. Separation of osmium from geological materials by solvent extraction for analysis by thermal ionisation mass spectrometry. *Anal. Chim. Acta* **2670**, 269–275 (1996).
  46. Birck, J. L. & Barman, M. R. Re–Os Isotopic Measurements at the Femtomole Level in Natural Samples. **20**, (1991).
  47. Kendall, B. S., Creaser, R. A., Ross, G. M. & Selby, D. Constraints on the timing of Marinoan “Snowball Earth” glaciation by 187Re–187Os dating of a Neoproterozoic, post-glacial black shale in Western Canada. *Earth Planet. Sci. Lett.* **222**, 729–740 (2004).
  48. Rooney, A. D., Chew, D. M. & Selby, D. Re–Os geochronology of the Neoproterozoic – Cambrian Dalradian Supergroup of Scotland and Ireland: Implications for Neoproterozoic stratigraphy, glaciations and Re–Os systematics. *Precambrian Res.* **185**, 202–214 (2011).
  49. Creaser, R. A., Papanastassiou, D. A. & Wasserburg, G. J. Negative thermal ion mass spectrometry of osmium, rhenium and iridium. *Geochim. Cosmochim. Acta* **55**, 397–401 (1991).
  50. Volkening, J., Walczyk, T. & Heumann, K. G. Osmium isotope ratio determinations by negative thermal ionization mass spectrometry. *Int. J. Mass Spectrom. Ion Process.* **105**, 147–159 (1991).

51. Luguét, A., Nowell, G. M. & Pearson, D. G. 184Os/188 Os and 186Os/188Os measurements by Negative Thermal Ionisation Mass Spectrometry (N-TIMS): Effects of interfering element and mass fractionation corrections on data accuracy and precision. *248*, 342–362 (2008).
52. Liu, J. & Pearson, D. G. Rapid, precise and accurate Os isotope ratio measurements of nanogram to sub-nanogram amounts using multiple Faraday collectors and amplifiers equipped with 10 12 Ω resistors by N-TIMS. *Chem. Geol.* **363**, 301–311 (2014).
53. Gramlich, J. W., Murphy, T. J., Garner, E. L. & Shields, W. R. Absolute Isotopic Abundance Ratio and Atomic Weight of a Reference Sample of Rhenium. *J. Res. Natl. Bur. Stand. Phys. Chem.* **77A**, 691–698 (1973).
54. Smoliar, M., Walker, R. J. & Morgan, J. W. Re-Os Ages of Group IIA , IIIA , IVA , and IVB Iron Meteorites. *Science (80-. )*. **271**, (1996).
55. Ludwig, K. R. Calculation of uncertainties of U-Pb isotope data. *Earth Planet. Sci. Lett.* **46**, 212–220 (1980).
56. Ludwig, K. R. *Isoplot version 4.15: a geochronological toolkit for microsoft Excel.* (2008).
57. Boggiani, P. C. *et al.* Chemostratigraphy of the Tamengo Formation (Corumbá Group, Brazil): A contribution to the calibration of the Ediacaran carbon-isotope curve. *Precambrian Res.* **182**, 382–401 (2010).
58. Saylor, B. Z., Kaufman, a J., Grotzinger, J. P. & Urban, F. A composite reference section for terminal proterozoic strata of southern Namibia. *J. Sediment. Res. A. Sediment. Petrol. Process.* **68**, 1223–1235 (1998).
59. Tahata, M. *et al.* Carbon and oxygen isotope chemostratigraphies of the Yangtze platform, South China: Decoding temperature and environmental changes through the Ediacaran. *Gondwana Res.* **23**, 333–353 (2013).
60. Jiang, G., Kaufman, A. J., Christie-Blick, N., Zhang, S. & Wu, H. Carbon isotope variability across the Ediacaran Yangtze platform in South China: Implications for a large surface-to-deep ocean ??13C gradient. *Earth Planet. Sci. Lett.* **261**, 303–320 (2007).
61. Kaufman, A. J., Jacobsen, S. B. & Knoll, A. H. The Vendian record of Sr and C isotopic variations in seawater: Implications for tectonics and paleoclimate. *Earth Planet. Sci. Lett.* **120**, (1993).
62. Pu, J. P. *et al.* Dodging snowballs: Geochronology of the Gaskiers glaciation and the first appearance of the Ediacaran biota. *Geology* **44**, 955–958 (2016).
63. Condon, D. *et al.* U-Pb Ages from the Neoproterozoic Doushantuo Formation, China. *Science (80-. )*. **308**, 95–98 (2005).
64. Linnemann, U. *et al.* New high - resolution age data from the Ediacaran – Cambrian boundary indicate rapid, ecologically driven onset of the Cambrian explosion. *Terra Nov.* (2019). doi:10.1111/ter.12368
65. Parry, L. A. *et al.* Ichnological evidence for meiofaunal bilaterians from the terminal Ediacaran and earliest Cambrian of Brazil. *Nat. Ecol. Evol.* **1**, 1455–1464 (2017).
66. Liu, P., Yin, C., Gao, L., Tang, F. & Chen, S. New material of microfossils from the Ediacaran Doushantuo Formation in the Zhangcunping area, Yichang, Hubei Province and its zircon SHRIMP U-Pb age. *Chinese Sci. Bull.* **54**, 1058–1064 (2009).
67. Schmitz, M. D. Radiometric ages used in GTS2012. in *The Geologic Time Scale 1045–1082* (Elsevier, 2012).

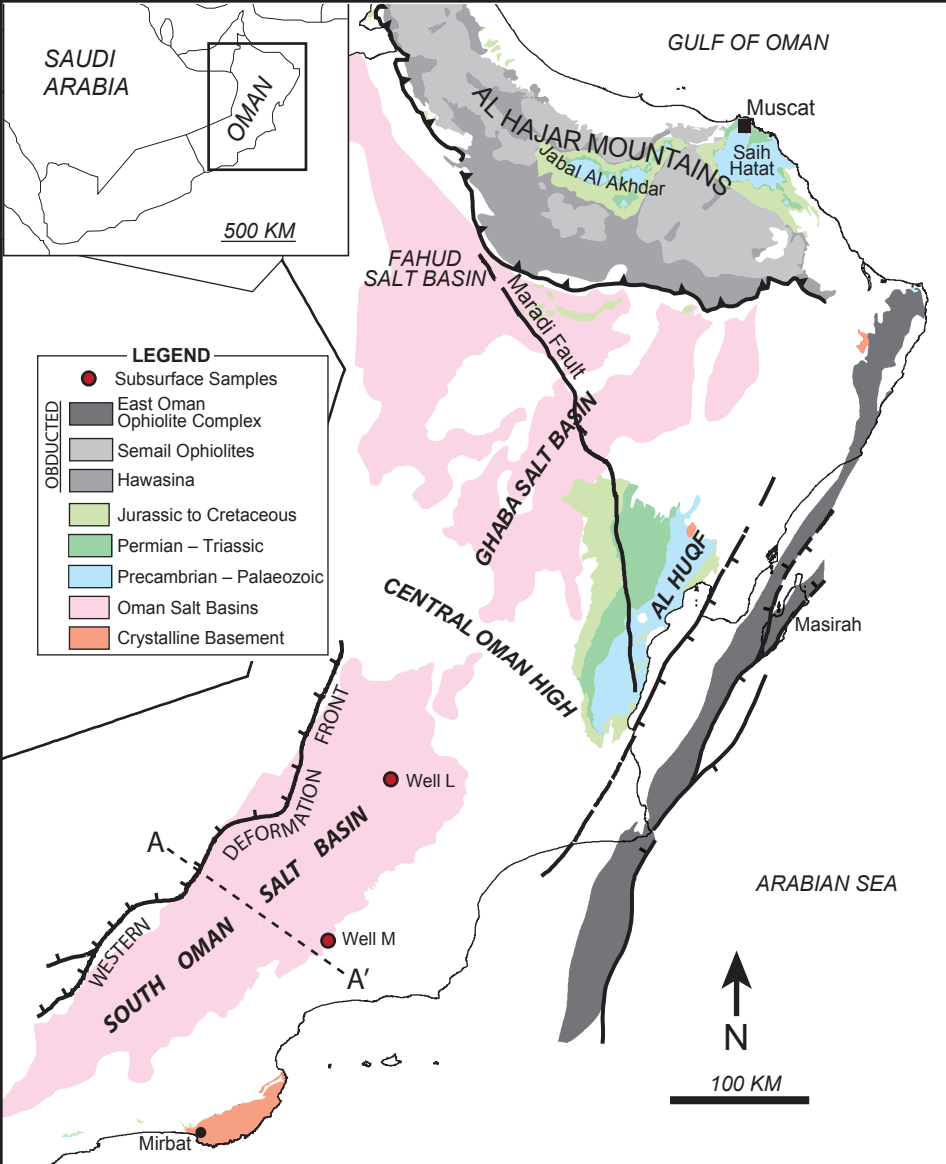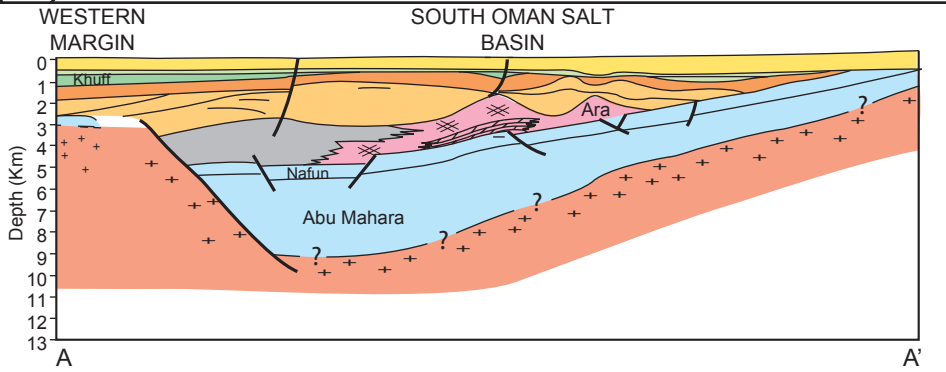

# Thamoud-6

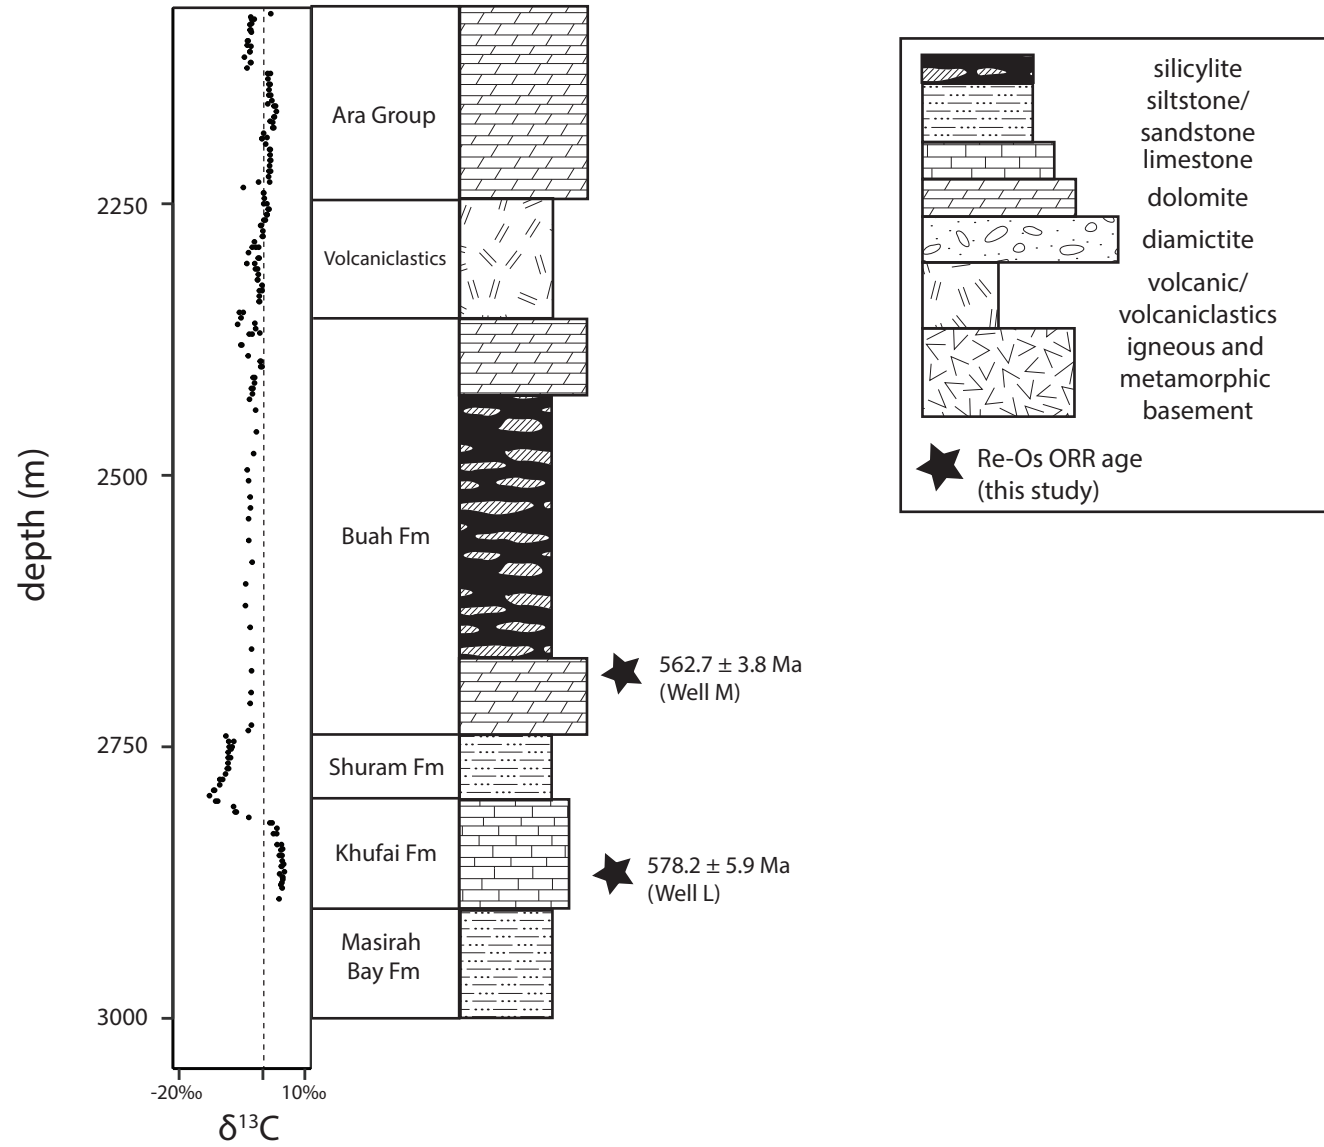

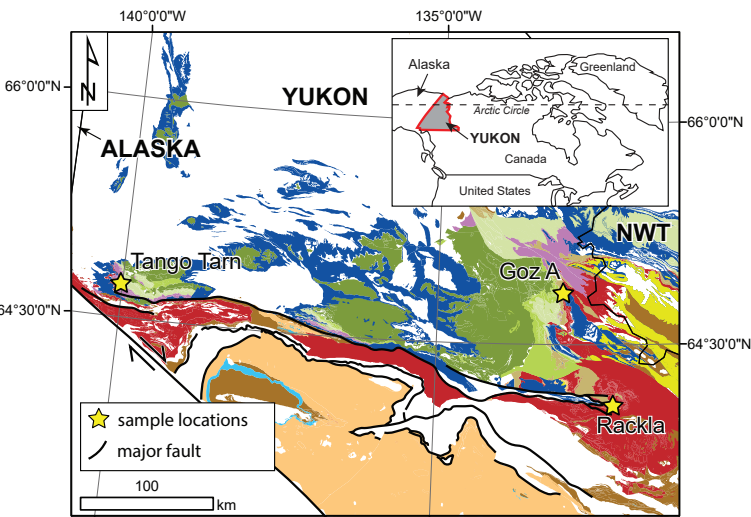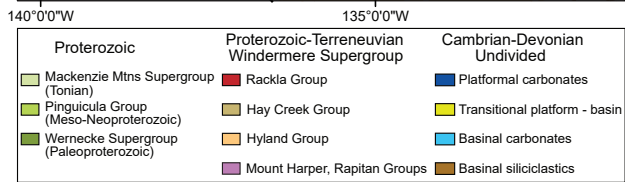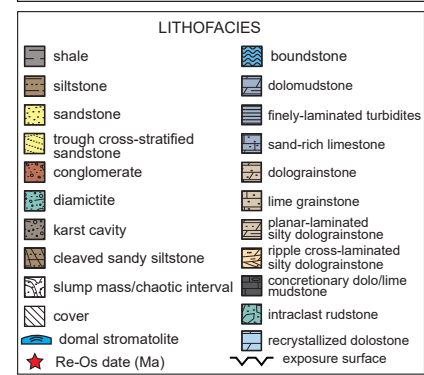

Shuram Carbon Isotope Excursion

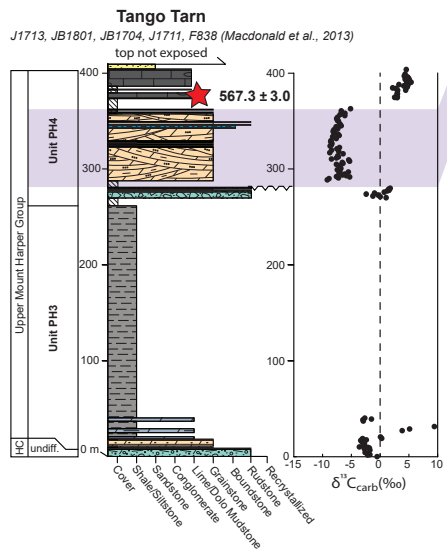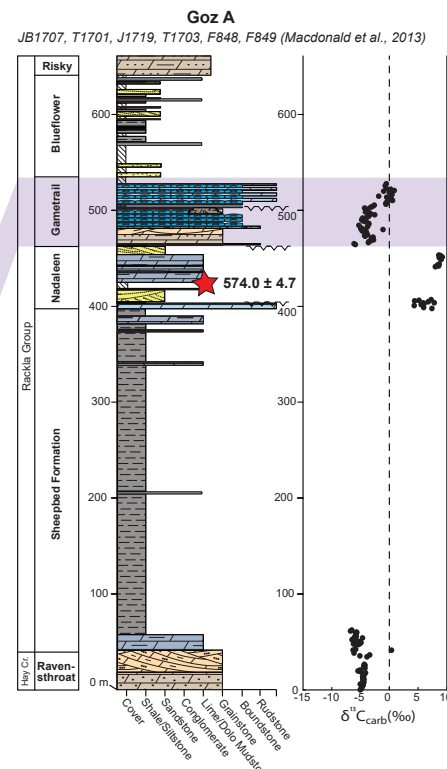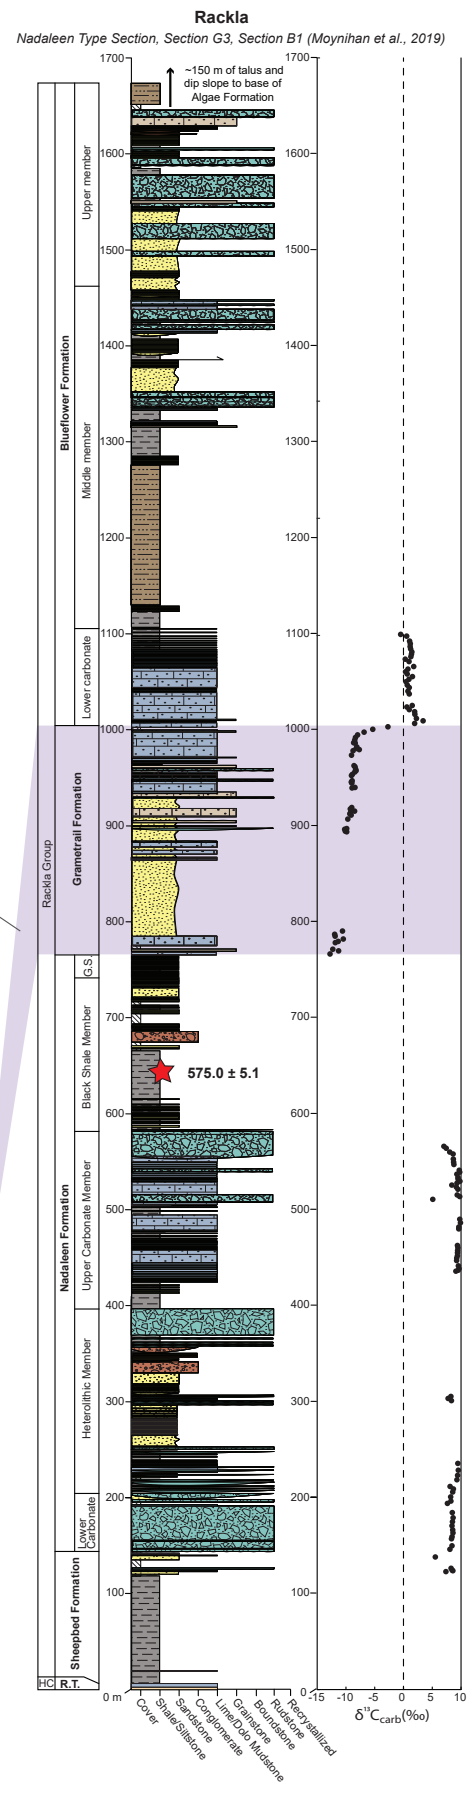

Table S1 Carbon Isotope Data

| Region                                                                                                                                                                                                                                                                                                 | Location       | Stratigraphic Height (Outcrop) (m) | Depth (Drillcore) (m) | $\delta^{13}C_{org}$ (‰) | Source                     | Unit            | Age*          | Note |
|--------------------------------------------------------------------------------------------------------------------------------------------------------------------------------------------------------------------------------------------------------------------------------------------------------|----------------|------------------------------------|-----------------------|--------------------------|----------------------------|-----------------|---------------|------|
| *Ages in bold are tied directly to an age constraint or other assumption as detailed in the Note. Ages not in bold are interpolated between them.                                                                                                                                                      |                |                                    |                       |                          |                            |                 |               |      |
| Oman                                                                                                                                                                                                                                                                                                   | Thamoud-6 core | n/a                                | 2074.00               | 2.23                     | Petroleum Development Oman | Ara Group       | 537.73        |      |
| Oman                                                                                                                                                                                                                                                                                                   | Thamoud-6 core | n/a                                | 2075.00               | 1.88                     | Petroleum Development Oman | Ara Group       | 537.79        |      |
| Oman                                                                                                                                                                                                                                                                                                   | Thamoud-6 core | n/a                                | 2078.00               | -2.8                     | Petroleum Development Oman | Ara Group       | 537.97        |      |
| Oman                                                                                                                                                                                                                                                                                                   | Thamoud-6 core | n/a                                | 2080.00               | -2.69                    | Petroleum Development Oman | Ara Group       | 538.08        |      |
| Oman                                                                                                                                                                                                                                                                                                   | Thamoud-6 core | n/a                                | 2080.00               | -2.06                    | Petroleum Development Oman | Ara Group       | 538.08        |      |
| Oman                                                                                                                                                                                                                                                                                                   | Thamoud-6 core | n/a                                | 2084.00               | -1.68                    | Petroleum Development Oman | Ara Group       | 538.32        |      |
| Oman                                                                                                                                                                                                                                                                                                   | Thamoud-6 core | n/a                                | 2085.00               | -3.08                    | Petroleum Development Oman | Ara Group       | 538.38        |      |
| Oman                                                                                                                                                                                                                                                                                                   | Thamoud-6 core | n/a                                | 2090.00               | -3.07                    | Petroleum Development Oman | Ara Group       | 538.67        |      |
| Oman                                                                                                                                                                                                                                                                                                   | Thamoud-6 core | n/a                                | 2090.00               | -2.89                    | Petroleum Development Oman | Ara Group       | 538.67        |      |
| Oman                                                                                                                                                                                                                                                                                                   | Thamoud-6 core | n/a                                | 2092.00               | -2.75                    | Petroleum Development Oman | Ara Group       | 538.78        |      |
| Oman                                                                                                                                                                                                                                                                                                   | Thamoud-6 core | n/a                                | 2100.00               | -3.67                    | Petroleum Development Oman | Ara Group       | 539.25        |      |
| Oman                                                                                                                                                                                                                                                                                                   | Thamoud-6 core | n/a                                | 2100.00               | -3.53                    | Petroleum Development Oman | Ara Group       | 539.25        |      |
| Oman                                                                                                                                                                                                                                                                                                   | Thamoud-6 core | n/a                                | 2104.00               | -3.73                    | Petroleum Development Oman | Ara Group       | 539.49        |      |
| Oman                                                                                                                                                                                                                                                                                                   | Thamoud-6 core | n/a                                | 2105.00               | -2.85                    | Petroleum Development Oman | Ara Group       | 539.54        |      |
| Oman                                                                                                                                                                                                                                                                                                   | Thamoud-6 core | n/a                                | 2110.00               | -3.11                    | Petroleum Development Oman | Ara Group       | 539.83        |      |
| Oman                                                                                                                                                                                                                                                                                                   | Thamoud-6 core | n/a                                | 2110.00               | -3.09                    | Petroleum Development Oman | Ara Group       | 539.83        |      |
| Oman                                                                                                                                                                                                                                                                                                   | Thamoud-6 core | n/a                                | 2115.00               | -4.41                    | Petroleum Development Oman | Ara Group       | 540.13        |      |
| Oman                                                                                                                                                                                                                                                                                                   | Thamoud-6 core | n/a                                | 2120.00               | -2.86                    | Petroleum Development Oman | Ara Group       | 540.42        |      |
| Oman                                                                                                                                                                                                                                                                                                   | Thamoud-6 core | n/a                                | 2120.00               | -2.95                    | Petroleum Development Oman | Ara Group       | 540.42        |      |
| Oman                                                                                                                                                                                                                                                                                                   | Thamoud-6 core | n/a                                | 2125.00               | -3.78                    | Petroleum Development Oman | Ara Group       | 540.71        |      |
| Oman                                                                                                                                                                                                                                                                                                   | Thamoud-6 core | n/a                                | 2130.00               | 1.8                      | Petroleum Development Oman | Ara Group       | 541.00        |      |
| ID-TIMS U-Pb age on ash layer with AAC unit of Ara Group, sample BBS-5, from Oman. Bowring et al. 2007. As recalculated in GTS 2012.                                                                                                                                                                   |                |                                    |                       |                          |                            |                 |               |      |
| Oman                                                                                                                                                                                                                                                                                                   | Thamoud-6 core | n/a                                | 2130.00               | 1.13                     | Petroleum Development Oman | Ara Group       | <b>541.00</b> |      |
| Oman                                                                                                                                                                                                                                                                                                   | Thamoud-6 core | n/a                                | 2135.00               | 1.21                     | Petroleum Development Oman | Ara Group       | 541.29        |      |
| Oman                                                                                                                                                                                                                                                                                                   | Thamoud-6 core | n/a                                | 2140.00               | 1.45                     | Petroleum Development Oman | Ara Group       | 541.58        |      |
| Oman                                                                                                                                                                                                                                                                                                   | Thamoud-6 core | n/a                                | 2140.00               | 1.73                     | Petroleum Development Oman | Ara Group       | 541.58        |      |
| Oman                                                                                                                                                                                                                                                                                                   | Thamoud-6 core | n/a                                | 2145.00               | 1.47                     | Petroleum Development Oman | Ara Group       | 541.88        |      |
| Oman                                                                                                                                                                                                                                                                                                   | Thamoud-6 core | n/a                                | 2150.00               | 1.42                     | Petroleum Development Oman | Ara Group       | 542.17        |      |
| Oman                                                                                                                                                                                                                                                                                                   | Thamoud-6 core | n/a                                | 2150.00               | 1.87                     | Petroleum Development Oman | Ara Group       | 542.17        |      |
| Oman                                                                                                                                                                                                                                                                                                   | Thamoud-6 core | n/a                                | 2155.00               | 2.15                     | Petroleum Development Oman | Ara Group       | 542.46        |      |
| Oman                                                                                                                                                                                                                                                                                                   | Thamoud-6 core | n/a                                | 2158.00               | 1.16                     | Petroleum Development Oman | Ara Group       | 542.63        |      |
| Oman                                                                                                                                                                                                                                                                                                   | Thamoud-6 core | n/a                                | 2160.00               | 3.02                     | Petroleum Development Oman | Ara Group       | 542.75        |      |
| Oman                                                                                                                                                                                                                                                                                                   | Thamoud-6 core | n/a                                | 2160.00               | 2.88                     | Petroleum Development Oman | Ara Group       | 542.75        |      |
| Oman                                                                                                                                                                                                                                                                                                   | Thamoud-6 core | n/a                                | 2165.00               | 1.22                     | Petroleum Development Oman | Ara Group       | 543.04        |      |
| Oman                                                                                                                                                                                                                                                                                                   | Thamoud-6 core | n/a                                | 2170.00               | 2.85                     | Petroleum Development Oman | Ara Group       | 543.33        |      |
| Oman                                                                                                                                                                                                                                                                                                   | Thamoud-6 core | n/a                                | 2170.00               | 2.75                     | Petroleum Development Oman | Ara Group       | 543.33        |      |
| Oman                                                                                                                                                                                                                                                                                                   | Thamoud-6 core | n/a                                | 2174.00               | 1.73                     | Petroleum Development Oman | Ara Group       | 543.57        |      |
| Oman                                                                                                                                                                                                                                                                                                   | Thamoud-6 core | n/a                                | 2175.00               | 2.35                     | Petroleum Development Oman | Ara Group       | 543.63        |      |
| Oman                                                                                                                                                                                                                                                                                                   | Thamoud-6 core | n/a                                | 2180.00               | 2.35                     | Petroleum Development Oman | Ara Group       | 543.92        |      |
| Oman                                                                                                                                                                                                                                                                                                   | Thamoud-6 core | n/a                                | 2180.00               | 2.6                      | Petroleum Development Oman | Ara Group       | 543.92        |      |
| Oman                                                                                                                                                                                                                                                                                                   | Thamoud-6 core | n/a                                | 2185.00               | 0.17                     | Petroleum Development Oman | Ara Group       | 544.21        |      |
| Oman                                                                                                                                                                                                                                                                                                   | Thamoud-6 core | n/a                                | 2189.00               | 0.98                     | Petroleum Development Oman | Ara Group       | 544.44        |      |
| Oman                                                                                                                                                                                                                                                                                                   | Thamoud-6 core | n/a                                | 2190.00               | -0.24                    | Petroleum Development Oman | Ara Group       | 544.50        |      |
| Oman                                                                                                                                                                                                                                                                                                   | Thamoud-6 core | n/a                                | 2190.00               | -0.21                    | Petroleum Development Oman | Ara Group       | 544.50        |      |
| Oman                                                                                                                                                                                                                                                                                                   | Thamoud-6 core | n/a                                | 2195.00               | 0.66                     | Petroleum Development Oman | Ara Group       | 544.79        |      |
| Oman                                                                                                                                                                                                                                                                                                   | Thamoud-6 core | n/a                                | 2200.00               | 1.77                     | Petroleum Development Oman | Ara Group       | 545.08        |      |
| Oman                                                                                                                                                                                                                                                                                                   | Thamoud-6 core | n/a                                | 2200.00               | 1.59                     | Petroleum Development Oman | Ara Group       | 545.08        |      |
| Oman                                                                                                                                                                                                                                                                                                   | Thamoud-6 core | n/a                                | 2205.00               | 1.73                     | Petroleum Development Oman | Ara Group       | 545.37        |      |
| Oman                                                                                                                                                                                                                                                                                                   | Thamoud-6 core | n/a                                | 2210.00               | 1.67                     | Petroleum Development Oman | Ara Group       | 545.67        |      |
| Oman                                                                                                                                                                                                                                                                                                   | Thamoud-6 core | n/a                                | 2210.00               | 1.71                     | Petroleum Development Oman | Ara Group       | 545.67        |      |
| Oman                                                                                                                                                                                                                                                                                                   | Thamoud-6 core | n/a                                | 2215.00               | 1.6                      | Petroleum Development Oman | Ara Group       | 545.96        |      |
| Oman                                                                                                                                                                                                                                                                                                   | Thamoud-6 core | n/a                                | 2220.00               | 1.46                     | Petroleum Development Oman | Ara Group       | 546.25        |      |
| Oman                                                                                                                                                                                                                                                                                                   | Thamoud-6 core | n/a                                | 2220.00               | 1.84                     | Petroleum Development Oman | Ara Group       | 546.25        |      |
| Oman                                                                                                                                                                                                                                                                                                   | Thamoud-6 core | n/a                                | 2225.00               | 1.38                     | Petroleum Development Oman | Ara Group       | 546.54        |      |
| Oman                                                                                                                                                                                                                                                                                                   | Thamoud-6 core | n/a                                | 2230.00               | 1.04                     | Petroleum Development Oman | Ara Group       | 546.83        |      |
| Oman                                                                                                                                                                                                                                                                                                   | Thamoud-6 core | n/a                                | 2230.00               | 1.61                     | Petroleum Development Oman | Ara Group       | 546.83        |      |
| Oman                                                                                                                                                                                                                                                                                                   | Thamoud-6 core | n/a                                | 2235.00               | 1.67                     | Petroleum Development Oman | Ara Group       | 547.12        |      |
| Oman                                                                                                                                                                                                                                                                                                   | Thamoud-6 core | n/a                                | 2240.00               | 0.17                     | Petroleum Development Oman | Ara Group       | 547.42        |      |
| Oman                                                                                                                                                                                                                                                                                                   | Thamoud-6 core | n/a                                | 2240.00               | 0.17                     | Petroleum Development Oman | Ara Group       | 547.42        |      |
| Oman                                                                                                                                                                                                                                                                                                   | Thamoud-6 core | n/a                                | 2245.00               | 0.34                     | Petroleum Development Oman | Ara Group       | 547.71        |      |
| Oman                                                                                                                                                                                                                                                                                                   | Thamoud-6 core | n/a                                | 2250.00               | 0.96                     | Petroleum Development Oman | Ara Group       | 548.00        |      |
| Estimated age of Buah-Ara unconformity, after Bowring et al. 2007.                                                                                                                                                                                                                                     |                |                                    |                       |                          |                            |                 |               |      |
| Oman                                                                                                                                                                                                                                                                                                   | Thamoud-6 core | n/a                                | 2250.00               | 0.19                     | Petroleum Development Oman | Ara Group       | <b>548</b>    |      |
| Oman                                                                                                                                                                                                                                                                                                   | Thamoud-6 core | n/a                                | 2255.00               | 1.47                     | Petroleum Development Oman | Volcaniclastics | 548.14        |      |
| Oman                                                                                                                                                                                                                                                                                                   | Thamoud-6 core | n/a                                | 2255.00               | 1.27                     | Petroleum Development Oman | Volcaniclastics | 548.14        |      |
| Oman                                                                                                                                                                                                                                                                                                   | Thamoud-6 core | n/a                                | 2260.00               | 0.86                     | Petroleum Development Oman | Volcaniclastics | 548.28        |      |
| Oman                                                                                                                                                                                                                                                                                                   | Thamoud-6 core | n/a                                | 2260.00               | 0.87                     | Petroleum Development Oman | Volcaniclastics | 548.28        |      |
| Oman                                                                                                                                                                                                                                                                                                   | Thamoud-6 core | n/a                                | 2260.00               | 1.01                     | Petroleum Development Oman | Volcaniclastics | 548.28        |      |
| Oman                                                                                                                                                                                                                                                                                                   | Thamoud-6 core | n/a                                | 2265.00               | 0.23                     | Petroleum Development Oman | Volcaniclastics | 548.42        |      |
| Oman                                                                                                                                                                                                                                                                                                   | Thamoud-6 core | n/a                                | 2265.00               | 0.59                     | Petroleum Development Oman | Volcaniclastics | 548.42        |      |
| Oman                                                                                                                                                                                                                                                                                                   | Thamoud-6 core | n/a                                | 2270.00               | 0.54                     | Petroleum Development Oman | Volcaniclastics | 548.56        |      |
| Oman                                                                                                                                                                                                                                                                                                   | Thamoud-6 core | n/a                                | 2270.00               | -0.39                    | Petroleum Development Oman | Volcaniclastics | 548.56        |      |
| Oman                                                                                                                                                                                                                                                                                                   | Thamoud-6 core | n/a                                | 2275.00               | 0                        | Petroleum Development Oman | Volcaniclastics | 548.70        |      |
| Oman                                                                                                                                                                                                                                                                                                   | Thamoud-6 core | n/a                                | 2280.00               | -0.13                    | Petroleum Development Oman | Volcaniclastics | 548.84        |      |
| Oman                                                                                                                                                                                                                                                                                                   | Thamoud-6 core | n/a                                | 2280.00               | 0.03                     | Petroleum Development Oman | Volcaniclastics | 548.84        |      |
| Oman                                                                                                                                                                                                                                                                                                   | Thamoud-6 core | n/a                                | 2285.00               | -0.02                    | Petroleum Development Oman | Volcaniclastics | 548.98        |      |
| Oman                                                                                                                                                                                                                                                                                                   | Thamoud-6 core | n/a                                | 2290.00               | -1.69                    | Petroleum Development Oman | Volcaniclastics | 549.12        |      |
| Oman                                                                                                                                                                                                                                                                                                   | Thamoud-6 core | n/a                                | 2290.00               | -0.54                    | Petroleum Development Oman | Volcaniclastics | 549.12        |      |
| Oman                                                                                                                                                                                                                                                                                                   | Thamoud-6 core | n/a                                | 2290.00               | 1.01                     | Petroleum Development Oman | Volcaniclastics | 549.12        |      |
| Oman                                                                                                                                                                                                                                                                                                   | Thamoud-6 core | n/a                                | 2295.00               | -2.44                    | Petroleum Development Oman | Volcaniclastics | 549.26        |      |
| Oman                                                                                                                                                                                                                                                                                                   | Thamoud-6 core | n/a                                | 2300.00               | -1.11                    | Petroleum Development Oman | Volcaniclastics | 549.40        |      |
| Oman                                                                                                                                                                                                                                                                                                   | Thamoud-6 core | n/a                                | 2300.00               | -0.89                    | Petroleum Development Oman | Volcaniclastics | 549.40        |      |
| Oman                                                                                                                                                                                                                                                                                                   | Thamoud-6 core | n/a                                | 2305.00               | -1.95                    | Petroleum Development Oman | Volcaniclastics | 549.55        |      |
| Oman                                                                                                                                                                                                                                                                                                   | Thamoud-6 core | n/a                                | 2305.00               | 1.83                     | Petroleum Development Oman | Volcaniclastics | 549.55        |      |
| Oman                                                                                                                                                                                                                                                                                                   | Thamoud-6 core | n/a                                | 2310.00               | -1.77                    | Petroleum Development Oman | Volcaniclastics | 549.69        |      |
| Oman                                                                                                                                                                                                                                                                                                   | Thamoud-6 core | n/a                                | 2310.00               | -1.27                    | Petroleum Development Oman | Volcaniclastics | 549.69        |      |
| Oman                                                                                                                                                                                                                                                                                                   | Thamoud-6 core | n/a                                | 2315.00               | -1.69                    | Petroleum Development Oman | Volcaniclastics | 549.83        |      |
| Oman                                                                                                                                                                                                                                                                                                   | Thamoud-6 core | n/a                                | 2320.00               | -1.23                    | Petroleum Development Oman | Volcaniclastics | 549.97        |      |
| Oman                                                                                                                                                                                                                                                                                                   | Thamoud-6 core | n/a                                | 2320.00               | -1.3                     | Petroleum Development Oman | Volcaniclastics | 549.97        |      |
| Oman                                                                                                                                                                                                                                                                                                   | Thamoud-6 core | n/a                                | 2325.00               | -0.19                    | Petroleum Development Oman | Volcaniclastics | 550.11        |      |
| Oman                                                                                                                                                                                                                                                                                                   | Thamoud-6 core | n/a                                | 2330.00               | -0.19                    | Petroleum Development Oman | Volcaniclastics | 550.25        |      |
| Oman                                                                                                                                                                                                                                                                                                   | Thamoud-6 core | n/a                                | 2330.00               | 0.84                     | Petroleum Development Oman | Volcaniclastics | 550.25        |      |
| Oman                                                                                                                                                                                                                                                                                                   | Thamoud-6 core | n/a                                | 2335.00               | -0.85                    | Petroleum Development Oman | Volcaniclastics | 550.39        |      |
| Oman                                                                                                                                                                                                                                                                                                   | Thamoud-6 core | n/a                                | 2340.00               | -0.78                    | Petroleum Development Oman | Volcaniclastics | 550.53        |      |
| Oman                                                                                                                                                                                                                                                                                                   | Thamoud-6 core | n/a                                | 2340.00               | -0.92                    | Petroleum Development Oman | Volcaniclastics | 550.53        |      |
| Oman                                                                                                                                                                                                                                                                                                   | Thamoud-6 core | n/a                                | 2350.00               | -5.81                    | Petroleum Development Oman | Volcaniclastics | 550.81        |      |
| Oman                                                                                                                                                                                                                                                                                                   | Thamoud-6 core | n/a                                | 2350.00               | -4.69                    | Petroleum Development Oman | Volcaniclastics | 550.81        |      |
| Oman                                                                                                                                                                                                                                                                                                   | Thamoud-6 core | n/a                                | 2355.00               | -5.21                    | Petroleum Development Oman | Volcaniclastics | 550.95        |      |
| ID-TIMS U-Pb date on ash layer in Doushantuo Fm, China. Condon et al. 2005. Associated with $\delta^{13}C$ values -0 permil above Shuram excursion; sequence boundary between age and excursion in Doushantuo stratigraphy. Correlated on the basis of chemostratigraphy. As recalculated in GTS 2012. |                |                                    |                       |                          |                            |                 |               |      |
| Oman                                                                                                                                                                                                                                                                                                   | Thamoud-6 core | n/a                                | 2360.00               | -1.92                    | Petroleum Development Oman | Buah Fm         | <b>551.09</b> |      |
| Oman                                                                                                                                                                                                                                                                                                   | Thamoud-6 core | n/a                                | 2361.00               | -4.03                    | Petroleum Development Oman | Buah Fm         | 551.42        |      |
| Oman                                                                                                                                                                                                                                                                                                   | Thamoud-6 core | n/a                                | 2365.00               | -1.73                    | Petroleum Development Oman | Buah Fm         | 552.75        |      |
| Oman                                                                                                                                                                                                                                                                                                   | Thamoud-6 core | n/a                                | 2369.00               | -0.73                    | Petroleum Development Oman | Buah Fm         | 554.08        |      |
| Oman                                                                                                                                                                                                                                                                                                   | Thamoud-6 core | n/a                                | 2370.00               | 0.25                     | Petroleum Development Oman | Buah Fm         | 554.41        |      |
| Oman                                                                                                                                                                                                                                                                                                   | Thamoud-6 core | n/a                                | 2370.00               | -2.57                    | Petroleum Development Oman | Buah Fm         | 554.41        |      |
| Oman                                                                                                                                                                                                                                                                                                   | Thamoud-6 core | n/a                                | 2380.00               | -5.27                    | Petroleum Development Oman | Buah Fm         | 557.72        |      |
| Oman                                                                                                                                                                                                                                                                                                   | Thamoud-6 core | n/a                                | 2380.00               | -5.02                    | Petroleum Development Oman | Buah Fm         | 557.72        |      |
| Oman                                                                                                                                                                                                                                                                                                   | Thamoud-6 core | n/a                                | 2390.00               | -3.51                    | Petroleum Development Oman | Buah Fm         | 561.04        |      |
| Well M sample, middle Buah Fm, Oman, this study. Sample Overlies Shuram excursion; associated with positive $\delta^{13}C$ values.                                                                                                                                                                     |                |                                    |                       |                          |                            |                 |               |      |
| Oman                                                                                                                                                                                                                                                                                                   | Thamoud-6 core | n/a                                | 2395.00               | -0.47                    | Petroleum Development Oman | Buah Fm         | <b>562.7</b>  |      |
| Oman                                                                                                                                                                                                                                                                                                   | Thamoud-6 core | n/a                                | 2395.00               | -0.64                    | Petroleum Development Oman | Buah Fm         | 562.70        |      |
| Oman                                                                                                                                                                                                                                                                                                   | Thamoud-6 core | n/a                                | 2400.00               | -0.19                    | Petroleum Development Oman | Buah Fm         | 562.78        |      |
| Oman                                                                                                                                                                                                                                                                                                   | Thamoud-6 core | n/a                                | 2400.00               | -0.52                    | Petroleum Development Oman | Buah Fm         | 562.78        |      |
| Oman                                                                                                                                                                                                                                                                                                   | Thamoud-6 core | n/a                                | 2410.00               | 1.86                     | Petroleum Development Oman | Buah Fm         | 562.93        |      |
| Oman                                                                                                                                                                                                                                                                                                   | Thamoud-6 core | n/a                                | 2410.00               | -2.33                    | Petroleum Development Oman | Buah Fm         | 562.93        |      |
| Oman                                                                                                                                                                                                                                                                                                   | Thamoud-6 core | n/a                                | 2415.00               | -2                       | Petroleum Development Oman | Buah Fm         | 563.00        |      |
| Oman                                                                                                                                                                                                                                                                                                   | Thamoud-6 core | n/a                                | 2420.00               | -2.74                    | Petroleum Development Oman | Buah Fm         | 563.08        |      |
| Oman                                                                                                                                                                                                                                                                                                   | Thamoud-6 core | n/a                                | 2420.00               | -2.37                    | Petroleum Development Oman | Buah Fm         | 563.08        |      |
| Oman                                                                                                                                                                                                                                                                                                   | Thamoud-6 core | n/a                                | 2425.00               | -2.49                    | Petroleum Development Oman | Buah Fm         | 563.15        |      |
| Oman                                                                                                                                                                                                                                                                                                   | Thamoud-6 core | n/a                                | 2430.00               | -3.2                     | Petroleum Development Oman | Buah Fm         | 563.23        |      |
| Oman                                                                                                                                                                                                                                                                                                   | Thamoud-6 core | n/a                                | 2440.00               | -1.74                    | Petroleum Development Oman | Buah Fm         | 563.38        |      |
| Oman                                                                                                                                                                                                                                                                                                   | Thamoud-6 core | n/a                                | 2460.00               | -1.55                    | Petroleum Development Oman | Buah Fm         | 563.68        |      |
| Oman                                                                                                                                                                                                                                                                                                   | Thamoud-6 core | n/a                                | 2480.00               | -2.22                    | Petroleum Development Oman | Buah Fm         | 563.99        |      |
| Oman                                                                                                                                                                                                                                                                                                   | Thamoud-6 core | n/a                                | 2495.00               | -3.73                    | Petroleum Development Oman | Buah Fm         | 564.21        |      |
| Oman                                                                                                                                                                                                                                                                                                   | Thamoud-6 core | n/a                                | 2505.00               | -4.42                    | Petroleum Development Oman | Buah Fm         | 564.36        |      |
| Oman                                                                                                                                                                                                                                                                                                   | Thamoud-6 core | n/a                                | 2520.00               | -3.03                    | Petroleum Development Oman | Buah Fm         | 564.59        |      |
| Oman                                                                                                                                                                                                                                                                                                   | Thamoud-6 core | n/a                                | 2530.00               | -2.97                    | Petroleum Development Oman | Buah Fm         | 564.74        |      |
| Oman                                                                                                                                                                                                                                                                                                   | Thamoud-6 core | n/a                                | 2540.00               | -3.42                    | Petroleum Development Oman | Buah Fm         | 564.89        |      |
| Oman                                                                                                                                                                                                                                                                                                   | Thamoud-6 core | n/a                                | 2550.00               | -3.37                    | Petroleum Development Oman | Buah Fm         | 565.19        |      |
| Oman                                                                                                                                                                                                                                                                                                   | Thamoud-6 core | n/a                                | 2580.00               | -2.55                    | Petroleum Development Oman | Buah Fm         | 565.49        |      |
| Oman                                                                                                                                                                                                                                                                                                   | Thamoud-6 core | n/a                                | 2600.00               | -4.11                    | Petroleum Development Oman | Buah Fm         | 566.79        |      |
| Oman                                                                                                                                                                                                                                                                                                   | Thamoud-6 core | n/a                                | 2620.00               | -4.17                    | Petroleum Development Oman | Buah Fm         | 566.09        |      |
| Oman                                                                                                                                                                                                                                                                                                   | Thamoud-6 core | n/a                                | 2640.00               | -3.03                    | Petroleum Development Oman | Buah Fm         | 566.40        |      |
| Oman                                                                                                                                                                                                                                                                                                   |                |                                    |                       |                          |                            |                 |               |      |







| Country | Core Name | Depth (m) | Age (ka) | Reference                 | Location                  | Age (ka) | Notes                                                                                                                                                                                                                                                                                                  |
|---------|-----------|-----------|----------|---------------------------|---------------------------|----------|--------------------------------------------------------------------------------------------------------------------------------------------------------------------------------------------------------------------------------------------------------------------------------------------------------|
| China   | D11 core  | n/a       | 35.6     | 1.87 Tahata et al. 2013   | Dengying Fm               | 547.29   | Tied to age model below built from Jiang et al. 2007 data for boundary of Shibantan and Hamajin members.                                                                                                                                                                                               |
| China   | D11 core  | n/a       | 36.08    | -0.32 Tahata et al. 2013  | Dengying Fm               | 547.38   |                                                                                                                                                                                                                                                                                                        |
| China   | D11 core  | n/a       | 41.06    | 1.15 Tahata et al. 2013   | Dengying Fm               | 548.33   |                                                                                                                                                                                                                                                                                                        |
| China   | D11 core  | n/a       | 41.15    | 1.7 Tahata et al. 2013    | Dengying Fm               | 548.35   |                                                                                                                                                                                                                                                                                                        |
| China   | D11 core  | n/a       | 41.2     | 1.5 Tahata et al. 2013    | Dengying Fm               | 548.36   |                                                                                                                                                                                                                                                                                                        |
| China   | D11 core  | n/a       | 41.21    | 2.87 Tahata et al. 2013   | Dengying Fm               | 548.36   |                                                                                                                                                                                                                                                                                                        |
| China   | D11 core  | n/a       | 41.25    | 1.77 Tahata et al. 2013   | Dengying Fm               | 548.37   |                                                                                                                                                                                                                                                                                                        |
| China   | D11 core  | n/a       | 41.28    | 2.53 Tahata et al. 2013   | Dengying Fm               | 548.37   |                                                                                                                                                                                                                                                                                                        |
| China   | D11 core  | n/a       | 44.67    | 1.66 Tahata et al. 2013   | Dengying Fm               | 549.02   |                                                                                                                                                                                                                                                                                                        |
| China   | D11 core  | n/a       | 46.05    | 2.82 Tahata et al. 2013   | Dengying Fm               | 549.28   |                                                                                                                                                                                                                                                                                                        |
| China   | D11 core  | n/a       | 49.61    | 1.83 Tahata et al. 2013   | Dengying Fm               | 549.96   |                                                                                                                                                                                                                                                                                                        |
| China   | D11 core  | n/a       | 50.6     | 1.21 Tahata et al. 2013   | Dengying Fm               | 550.15   |                                                                                                                                                                                                                                                                                                        |
| China   | D11 core  | n/a       | 52.61    | 1.64 Tahata et al. 2013   | Dengying Fm               | 550.53   |                                                                                                                                                                                                                                                                                                        |
| China   | D11 core  | n/a       | 52.92    | -1.4 Tahata et al. 2013   | Dengying Fm               | 550.59   |                                                                                                                                                                                                                                                                                                        |
| China   | D11 core  | n/a       | 53       | 0.74 Tahata et al. 2013   | Dengying Fm               | 550.60   |                                                                                                                                                                                                                                                                                                        |
| China   | D11 core  | n/a       | 54.8     | -0.34 Tahata et al. 2013  | Dengying Fm               | 550.91   |                                                                                                                                                                                                                                                                                                        |
| China   | D11 core  | n/a       | 54.76    | -1.05 Tahata et al. 2013  | Dengying Fm               | 550.94   |                                                                                                                                                                                                                                                                                                        |
| China   | D11 core  | n/a       | 55.34    | -0.84 Tahata et al. 2013  | Dengying Fm               | 551.05   |                                                                                                                                                                                                                                                                                                        |
| China   | D11 core  | n/a       | 55.47    | -0.66 Tahata et al. 2013  | Dengying Fm               | 551.07   |                                                                                                                                                                                                                                                                                                        |
| China   | D11 core  | n/a       | 55.56    | -3.05 Tahata et al. 2013  | Doushanuo Fm (Member IV)  | 551.09   | ID-TIMS U-Pb date on ash layer in Doushanuo Fm, China. Associated with 513C values -0 permil, above Shuram Excursion, sequence boundary between age and excursion in stratigraphy. Condon et al. 2005. As recalculated in GTS 2012.                                                                    |
| China   | D11 core  | n/a       | 58.59    | -0.05 Tahata et al. 2013  | Doushanuo Fm (Member IV)  | 560.27   |                                                                                                                                                                                                                                                                                                        |
| China   | D11 core  | n/a       | 60.91    | -4.38 Tahata et al. 2013  | Doushanuo Fm (Member IV)  | 567.3    | Sample A1707, Blueflower Fm, NW Canada. Lies 16 m above the contact with the underlying Gametail Fm. Coal Creek location, lies in +2 permille plateau above a carbonate gap. Correlated to China on the basis of chemostratigraphy (return to less negative 513C values) and existing age constraints. |
| China   | D11 core  | n/a       | 62.4     | -2.27 Tahata et al. 2013  | Doushanuo Fm (Member III) | 567.53   |                                                                                                                                                                                                                                                                                                        |
| China   | D11 core  | n/a       | 62.48    | -3.89 Tahata et al. 2013  | Doushanuo Fm (Member III) | 567.54   |                                                                                                                                                                                                                                                                                                        |
| China   | D11 core  | n/a       | 64.11    | -7.81 Tahata et al. 2013  | Doushanuo Fm (Member III) | 567.79   |                                                                                                                                                                                                                                                                                                        |
| China   | D11 core  | n/a       | 68.54    | -7.88 Tahata et al. 2013  | Doushanuo Fm (Member III) | 568.47   |                                                                                                                                                                                                                                                                                                        |
| China   | D11 core  | n/a       | 72.2     | -6.43 Tahata et al. 2013  | Doushanuo Fm (Member III) | 569.03   |                                                                                                                                                                                                                                                                                                        |
| China   | D11 core  | n/a       | 72.39    | -9.27 Tahata et al. 2013  | Doushanuo Fm (Member III) | 569.06   |                                                                                                                                                                                                                                                                                                        |
| China   | D11 core  | n/a       | 73.87    | -7.93 Tahata et al. 2013  | Doushanuo Fm (Member III) | 569.29   |                                                                                                                                                                                                                                                                                                        |
| China   | D11 core  | n/a       | 73.95    | -6.66 Tahata et al. 2013  | Doushanuo Fm (Member III) | 569.30   |                                                                                                                                                                                                                                                                                                        |
| China   | D11 core  | n/a       | 75.4     | -8.17 Tahata et al. 2013  | Doushanuo Fm (Member III) | 569.52   |                                                                                                                                                                                                                                                                                                        |
| China   | D11 core  | n/a       | 75.86    | -6.82 Tahata et al. 2013  | Doushanuo Fm (Member III) | 569.59   |                                                                                                                                                                                                                                                                                                        |
| China   | D11 core  | n/a       | 75.9     | -6.19 Tahata et al. 2013  | Doushanuo Fm (Member III) | 569.60   |                                                                                                                                                                                                                                                                                                        |
| China   | D11 core  | n/a       | 78.22    | -2.27 Tahata et al. 2013  | Doushanuo Fm (Member III) | 569.65   |                                                                                                                                                                                                                                                                                                        |
| China   | D11 core  | n/a       | 80.92    | -6.11 Tahata et al. 2013  | Doushanuo Fm (Member III) | 570.37   |                                                                                                                                                                                                                                                                                                        |
| China   | D11 core  | n/a       | 81.07    | -6.96 Tahata et al. 2013  | Doushanuo Fm (Member III) | 570.39   |                                                                                                                                                                                                                                                                                                        |
| China   | D11 core  | n/a       | 84.17    | -7.99 Tahata et al. 2013  | Doushanuo Fm (Member III) | 570.86   |                                                                                                                                                                                                                                                                                                        |
| China   | D11 core  | n/a       | 87.23    | -6.07 Tahata et al. 2013  | Doushanuo Fm (Member III) | 571.33   |                                                                                                                                                                                                                                                                                                        |
| China   | D11 core  | n/a       | 87.38    | -6.04 Tahata et al. 2013  | Doushanuo Fm (Member III) | 571.36   |                                                                                                                                                                                                                                                                                                        |
| China   | D11 core  | n/a       | 89.35    | -8.9 Tahata et al. 2013   | Doushanuo Fm (Member III) | 571.86   |                                                                                                                                                                                                                                                                                                        |
| China   | D11 core  | n/a       | 89.87    | -6.71 Tahata et al. 2013  | Doushanuo Fm (Member III) | 571.75   |                                                                                                                                                                                                                                                                                                        |
| China   | D11 core  | n/a       | 91.1     | -8.99 Tahata et al. 2013  | Doushanuo Fm (Member III) | 571.93   |                                                                                                                                                                                                                                                                                                        |
| China   | D11 core  | n/a       | 92.4     | -8.82 Tahata et al. 2013  | Doushanuo Fm (Member III) | 572.13   |                                                                                                                                                                                                                                                                                                        |
| China   | D11 core  | n/a       | 92.53    | -11.12 Tahata et al. 2013 | Doushanuo Fm (Member III) | 572.15   |                                                                                                                                                                                                                                                                                                        |
| China   | D11 core  | n/a       | 93.65    | -6.94 Tahata et al. 2013  | Doushanuo Fm (Member III) | 572.32   |                                                                                                                                                                                                                                                                                                        |
| China   | D11 core  | n/a       | 94.61    | -9 Tahata et al. 2013     | Doushanuo Fm (Member III) | 572.50   |                                                                                                                                                                                                                                                                                                        |
| China   | D11 core  | n/a       | 95.95    | -6.48 Tahata et al. 2013  | Doushanuo Fm (Member III) | 572.67   |                                                                                                                                                                                                                                                                                                        |
| China   | D11 core  | n/a       | 96.44    | -7.78 Tahata et al. 2013  | Doushanuo Fm (Member III) | 572.74   |                                                                                                                                                                                                                                                                                                        |
| China   | D11 core  | n/a       | 97.19    | -6.38 Tahata et al. 2013  | Doushanuo Fm (Member III) | 572.86   |                                                                                                                                                                                                                                                                                                        |
| China   | D11 core  | n/a       | 97.33    | -6.39 Tahata et al. 2013  | Doushanuo Fm (Member III) | 572.88   |                                                                                                                                                                                                                                                                                                        |
| China   | D11 core  | n/a       | 97.47    | -6.17 Tahata et al. 2013  | Doushanuo Fm (Member III) | 572.90   |                                                                                                                                                                                                                                                                                                        |
| China   | D11 core  | n/a       | 97.79    | -7.76 Tahata et al. 2013  | Doushanuo Fm (Member III) | 572.95   |                                                                                                                                                                                                                                                                                                        |
| China   | D11 core  | n/a       | 97.94    | -6.11 Tahata et al. 2013  | Doushanuo Fm (Member III) | 572.97   |                                                                                                                                                                                                                                                                                                        |
| China   | D11 core  | n/a       | 98.19    | -7.39 Tahata et al. 2013  | Doushanuo Fm (Member III) | 573.01   |                                                                                                                                                                                                                                                                                                        |
| China   | D11 core  | n/a       | 98.48    | -8.3 Tahata et al. 2013   | Doushanuo Fm (Member III) | 573.06   |                                                                                                                                                                                                                                                                                                        |
| China   | D11 core  | n/a       | 98.65    | -6.56 Tahata et al. 2013  | Doushanuo Fm (Member III) | 573.08   |                                                                                                                                                                                                                                                                                                        |
| China   | D11 core  | n/a       | 98.67    | -6.87 Tahata et al. 2013  | Doushanuo Fm (Member III) | 573.09   |                                                                                                                                                                                                                                                                                                        |
| China   | D11 core  | n/a       | 99       | -6.14 Tahata et al. 2013  | Doushanuo Fm (Member III) | 573.14   |                                                                                                                                                                                                                                                                                                        |
| China   | D11 core  | n/a       | 99.26    | -7.73 Tahata et al. 2013  | Doushanuo Fm (Member III) | 573.18   |                                                                                                                                                                                                                                                                                                        |
| China   | D11 core  | n/a       | 99.55    | -5.56 Tahata et al. 2013  | Doushanuo Fm (Member III) | 573.22   |                                                                                                                                                                                                                                                                                                        |
| China   | D11 core  | n/a       | 99.72    | -7.37 Tahata et al. 2013  | Doushanuo Fm (Member III) | 573.25   |                                                                                                                                                                                                                                                                                                        |
| China   | D11 core  | n/a       | 99.85    | -7.21 Tahata et al. 2013  | Doushanuo Fm (Member III) | 573.27   |                                                                                                                                                                                                                                                                                                        |
| China   | D11 core  | n/a       | 100.05   | -7.15 Tahata et al. 2013  | Doushanuo Fm (Member III) | 573.29   |                                                                                                                                                                                                                                                                                                        |
| China   | D11 core  | n/a       | 100.13   | -6.78 Tahata et al. 2013  | Doushanuo Fm (Member III) | 573.31   |                                                                                                                                                                                                                                                                                                        |
| China   | D11 core  | n/a       | 100.27   | -6.75 Tahata et al. 2013  | Doushanuo Fm (Member III) | 573.33   |                                                                                                                                                                                                                                                                                                        |
| China   | D11 core  | n/a       | 100.43   | -6.65 Tahata et al. 2013  | Doushanuo Fm (Member III) | 573.36   |                                                                                                                                                                                                                                                                                                        |
| China   | D11 core  | n/a       | 100.52   | -6.48 Tahata et al. 2013  | Doushanuo Fm (Member III) | 573.37   |                                                                                                                                                                                                                                                                                                        |
| China   | D11 core  | n/a       | 100.65   | -6.3 Tahata et al. 2013   | Doushanuo Fm (Member III) | 573.39   |                                                                                                                                                                                                                                                                                                        |
| China   | D11 core  | n/a       | 100.8    | -7.32 Tahata et al. 2013  | Doushanuo Fm (Member III) | 573.41   |                                                                                                                                                                                                                                                                                                        |
| China   | D11 core  | n/a       | 100.99   | -7.28 Tahata et al. 2013  | Doushanuo Fm (Member III) | 573.44   |                                                                                                                                                                                                                                                                                                        |
| China   | D11 core  | n/a       | 101.13   | -6.58 Tahata et al. 2013  | Doushanuo Fm (Member III) | 573.46   |                                                                                                                                                                                                                                                                                                        |
| China   | D11 core  | n/a       | 101.38   | -5.97 Tahata et al. 2013  | Doushanuo Fm (Member III) | 573.50   |                                                                                                                                                                                                                                                                                                        |
| China   | D11 core  | n/a       | 101.5    | -6.7 Tahata et al. 2013   | Doushanuo Fm (Member III) | 573.52   |                                                                                                                                                                                                                                                                                                        |
| China   | D11 core  | n/a       | 101.67   | -5.95 Tahata et al. 2013  | Doushanuo Fm (Member III) | 573.55   |                                                                                                                                                                                                                                                                                                        |
| China   | D11 core  | n/a       | 101.89   | -5.52 Tahata et al. 2013  | Doushanuo Fm (Member III) | 573.58   |                                                                                                                                                                                                                                                                                                        |
| China   | D11 core  | n/a       | 102.01   | -6.25 Tahata et al. 2013  | Doushanuo Fm (Member III) | 573.60   |                                                                                                                                                                                                                                                                                                        |
| China   | D11 core  | n/a       | 102.09   | -4.99 Tahata et al. 2013  | Doushanuo Fm (Member III) | 573.61   |                                                                                                                                                                                                                                                                                                        |
| China   | D11 core  | n/a       | 102.17   | -4.89 Tahata et al. 2013  | Doushanuo Fm (Member III) | 573.62   |                                                                                                                                                                                                                                                                                                        |
| China   | D11 core  | n/a       | 102.32   | -4.37 Tahata et al. 2013  | Doushanuo Fm (Member III) | 573.65   |                                                                                                                                                                                                                                                                                                        |
| China   | D11 core  | n/a       | 102.54   | -4.1 Tahata et al. 2013   | Doushanuo Fm (Member III) | 573.68   |                                                                                                                                                                                                                                                                                                        |
| China   | D11 core  | n/a       | 104.06   | -0.31 Tahata et al. 2013  | Doushanuo Fm (Member III) | 573.81   |                                                                                                                                                                                                                                                                                                        |
| China   | D11 core  | n/a       | 104.63   | -0.27 Tahata et al. 2013  | Doushanuo Fm (Member III) | 574      | Sample J1719, Nadaleen Fm, NW Canada, this study. Underlies Shuram excursion. Correlated to China on the basis of chemostratigraphy.                                                                                                                                                                   |
| China   | D11 core  | n/a       | 105.91   | 0.65 Tahata et al. 2013   | Doushanuo Fm (Member III) | 574.95   |                                                                                                                                                                                                                                                                                                        |
| China   | D11 core  | n/a       | 107.4    | 0.93 Tahata et al. 2013   | Doushanuo Fm (Member III) | 576.07   |                                                                                                                                                                                                                                                                                                        |
| China   | D11 core  | n/a       | 108.12   | 0.95 Tahata et al. 2013   | Doushanuo Fm (Member III) | 576.60   |                                                                                                                                                                                                                                                                                                        |
| China   | D11 core  | n/a       | 109.54   | 2.31 Tahata et al. 2013   | Doushanuo Fm (Member III) | 577.66   |                                                                                                                                                                                                                                                                                                        |
| China   | D11 core  | n/a       | 109.67   | 1.14 Tahata et al. 2013   | Doushanuo Fm (Member III) | 577.76   |                                                                                                                                                                                                                                                                                                        |
| China   | D11 core  | n/a       | 109.97   | 3.05 Tahata et al. 2013   | Doushanuo Fm (Member III) | 577.98   |                                                                                                                                                                                                                                                                                                        |
| China   | D11 core  | n/a       | 111.54   | 4.34 Tahata et al. 2013   | Doushanuo Fm (Member III) | 579.15   |                                                                                                                                                                                                                                                                                                        |
| China   | D11 core  | n/a       | 111.83   | 4.09 Tahata et al. 2013   | Doushanuo Fm (Member III) | 579.37   |                                                                                                                                                                                                                                                                                                        |
| China   | D11 core  | n/a       | 112.53   | 4.47 Tahata et al. 2013   | Doushanuo Fm (Member III) | 579.89   |                                                                                                                                                                                                                                                                                                        |
| China   | D11 core  | n/a       | 112.56   | 4.38 Tahata et al. 2013   | Doushanuo Fm (Member III) | 579.91   |                                                                                                                                                                                                                                                                                                        |
| China   | D11 core  | n/a       | 112.76   | 4.38 Tahata et al. 2013   | Doushanuo Fm (Member III) | 580.06   |                                                                                                                                                                                                                                                                                                        |
| China   | D11 core  | n/a       | 112.9    | 4.42 Tahata et al. 2013   | Doushanuo Fm (Member III) | 580.17   |                                                                                                                                                                                                                                                                                                        |
| China   | D11 core  | n/a       | 113.57   | 4.83 Tahata et al. 2013   | Doushanuo Fm (Member III) | 580.67   |                                                                                                                                                                                                                                                                                                        |
| China   | D11 core  | n/a       | 114      | 4.62 Tahata et al. 2013   | Doushanuo Fm (Member III) | 580.99   |                                                                                                                                                                                                                                                                                                        |
| China   | D11 core  | n/a       | 114.18   | 4.42 Tahata et al. 2013   | Doushanuo Fm (Member III) | 581.12   |                                                                                                                                                                                                                                                                                                        |
| China   | D11 core  | n/a       | 114.49   | 4.84 Tahata et al. 2013   | Doushanuo Fm (Member III) | 581.35   |                                                                                                                                                                                                                                                                                                        |
| China   | D11 core  | n/a       | 114.58   | 4.11 Tahata et al. 2013   | Doushanuo Fm (Member III) | 581.42   |                                                                                                                                                                                                                                                                                                        |
| China   | D11 core  | n/a       | 114.81   | 4.83 Tahata et al. 2013   | Doushanuo Fm (Member III) | 581.59   |                                                                                                                                                                                                                                                                                                        |
| China   | D11 core  | n/a       | 114.97   | 4.78 Tahata et al. 2013   | Doushanuo Fm (Member III) | 581.71   |                                                                                                                                                                                                                                                                                                        |
| China   | D11 core  | n/a       | 115.11   | 4.54 Tahata et al. 2013   | Doushanuo Fm (Member III) | 581.82   |                                                                                                                                                                                                                                                                                                        |
| China   | D11 core  | n/a       | 115.22   | 4.92 Tahata et al. 2013   | Doushanuo Fm (Member III) | 581.90   |                                                                                                                                                                                                                                                                                                        |
| China   | D11 core  | n/a       | 115.39   | 4.96 Tahata et al. 2013   | Doushanuo Fm (Member III) | 582.03   |                                                                                                                                                                                                                                                                                                        |
| China   | D11 core  | n/a       | 115.58   | 4.4 Tahata et al. 2013    | Doushanuo Fm (Member III) | 582.17   |                                                                                                                                                                                                                                                                                                        |
| China   | D11 core  | n/a       | 115.63   | 4.73 Tahata et al. 2013   | Doushanuo Fm (Member III) | 582.20   |                                                                                                                                                                                                                                                                                                        |
| China   | D11 core  | n/a       | 115.84   | 4.34 Tahata et al. 2013   | Doushanuo Fm (Member III) | 582.36   |                                                                                                                                                                                                                                                                                                        |
| China   | D11 core  | n/a       | 116.21   | 4.58 Tahata et al. 2013   | Doushanuo Fm (Member III) | 582.64   |                                                                                                                                                                                                                                                                                                        |
| China   | D11 core  | n/a       | 116.43   | 4.4 Tahata et al. 2013    | Doushanuo Fm (Member III) | 582.80   |                                                                                                                                                                                                                                                                                                        |
| China   | D11 core  | n/a       | 116.62   | 4.31 Tahata et al. 2013   | Doushanuo Fm (Member III) | 582.94   |                                                                                                                                                                                                                                                                                                        |
| China   | D11 core  | n/a       | 116.76   | 4.15 Tahata et al. 2013   | Doushanuo Fm (Member III) | 583.05   |                                                                                                                                                                                                                                                                                                        |
| China   | D11 core  | n/a       | 116.87   | 4.27 Tahata et al. 2013   | Doushanuo Fm (Member III) | 583.13   |                                                                                                                                                                                                                                                                                                        |
| China   | D11 core  | n/a       | 117.62   | 5.45 Tahata et al. 2013   | Doushanuo Fm (Member III) | 583.24   |                                                                                                                                                                                                                                                                                                        |
| China   | D11 core  | n/a       | 117.21   | 5.15 Tahata et al. 2013   | Doushanuo Fm (Member III) | 583.38   |                                                                                                                                                                                                                                                                                                        |
| China   | D11 core  | n/a       | 117.34   | 5.45 Tahata et al. 2013   | Doushanuo Fm (Member III) | 583.48   |                                                                                                                                                                                                                                                                                                        |
| China   | D11 core  | n/a       | 117.63   | 4.88 Tahata et al. 2013   | Doushanuo Fm (Member III) | 583.92   |                                                                                                                                                                                                                                                                                                        |
| China   | D11 core  | n/a       | 118.03   | 5.11 Tahata et al. 2013   | Doushanuo Fm (Member III) | 583.99   |                                                                                                                                                                                                                                                                                                        |
| China   | D11 core  | n/a       | 118.24   | 5.12 Tahata et al. 2013   | Doushanuo Fm (Member III) | 584.15   |                                                                                                                                                                                                                                                                                                        |
| China   | D11 core  | n/a       | 118.4    | 5.24 Tahata et al. 2013   | Doushanuo Fm (Member III) | 584.27   |                                                                                                                                                                                                                                                                                                        |
| China   | D11 core  | n/a       | 118.54   | 5.05 Tahata et al. 2013   | Doushanuo Fm (Member III) | 584.37   |                                                                                                                                                                                                                                                                                                        |
| China   | D11 core  | n/a       | 118.66   | 4.98 Tahata et al. 2013   | Doushanuo Fm (Member III) | 584.48   |                                                                                                                                                                                                                                                                                                        |
| China   | D11 core  | n/a       | 118.84   | 4.89 Tahata et al. 2013   | Doushanuo Fm (Member III) | 584.60   |                                                                                                                                                                                                                                                                                                        |
| China   | D11 core  | n/a       | 119.08   | 5.21 Tahata et al. 2013   | Doushanuo Fm (Member III) | 584.78   |                                                                                                                                                                                                                                                                                                        |
| China   | D11 core  | n/a       | 119.49   | 5.22 Tahata et al. 2013   | Doushanuo Fm (Member III) | 585.08   |                                                                                                                                                                                                                                                                                                        |
| China   | D11 core  | n/a       | 119.63   | 5.08 Tahata et al. 2013   | Doushanuo Fm (Member III) | 585.19   |                                                                                                                                                                                                                                                                                                        |
| China   | D11 core  | n/a       | 119.75   | 4.95 Tahata et al. 2013   | Doushanuo Fm (Member III) | 585.28   |                                                                                                                                                                                                                                                                                                        |
| China   | D11 core  | n/a       | 119.99   | 5.01 Tahata et al. 2013   | Doushanuo Fm (Member III) | 585.46   |                                                                                                                                                                                                                                                                                                        |
| China   | D11 core  | n/a       | 120.17   | 4.72 Tahata et al. 2013   | Doushanuo Fm (Member III) | 585.59   |                                                                                                                                                                                                                                                                                                        |
| China   | D11 core  | n/a       | 120.42   | 4.81 Tahata et al. 2013   | Doushanuo Fm (Member III) | 585.78   |                                                                                                                                                                                                                                                                                                        |
| China   | D11 core  | n/a       | 120.57   | 4.61 Tahata et al. 2013   | Doushanuo Fm (Member III) | 585.89   |                                                                                                                                                                                                                                                                                                        |
| China   | D11 core  | n/a       | 120.76   | 4.93 Tahata et al. 2013   | Doushanuo Fm (Member III) | 586.03   |                                                                                                                                                                                                                                                                                                        |
| China   | D11 core  | n/a       | 121.81   | 4.87 Tahata               |                           |          |                                                                                                                                                                                                                                                                                                        |



|         |                           |        |        |                                                   |                                        |        |
|---------|---------------------------|--------|--------|---------------------------------------------------|----------------------------------------|--------|
| China   | Dirt core                 | n/a    | 280.42 | -2.48 Tahata et al. 2013                          | Doushanuo Fm (Member I, cap carbonate) | 634.57 |
| China   | Dirt core                 | n/a    | 280.48 | -2.32 Tahata et al. 2013                          | Doushanuo Fm (Member I, cap carbonate) | 634.60 |
| China   | Dirt core                 | n/a    | 280.52 | -2.3 Tahata et al. 2013                           | Doushanuo Fm (Member I, cap carbonate) | 634.62 |
| China   | Dirt core                 | n/a    | 280.57 | -2.58 Tahata et al. 2013                          | Doushanuo Fm (Member I, cap carbonate) | 634.64 |
| China   | Dirt core                 | n/a    | 280.66 | -2.26 Tahata et al. 2013                          | Doushanuo Fm (Member I, cap carbonate) | 634.68 |
| China   | Dirt core                 | n/a    | 280.69 | -1.55 Tahata et al. 2013                          | Doushanuo Fm (Member I, cap carbonate) | 634.70 |
| China   | Dirt core                 | n/a    | 281.74 | -2.96 Tahata et al. 2013                          | Doushanuo Fm (Member I, cap carbonate) | 635.20 |
| China   | Dirt core                 | n/a    | 281.87 | -3.5 Tahata et al. 2013                           | Doushanuo Fm (Member I, cap carbonate) | 635.26 |
| China   | Junrongwan                | 155.50 | n/a    | -5.02 Jang et al. 2007                            | Doushanuo (Member IV)                  | 551.99 |
| China   | Junrongwan                | 156.00 | n/a    | -1.8 Jang et al. 2007                             | Doushanuo (Member IV)                  | 551.06 |
| China   | Junrongwan                | 156.20 | n/a    | -1.75 Jang et al. 2007                            | Dengying Fm                            | 551.05 |
| China   | Junrongwan                | 156.40 | n/a    | -1.23 Jang et al. 2007                            | Dengying Fm                            | 551.03 |
| China   | Junrongwan                | 159.00 | n/a    | 0.92 Jang et al. 2007                             | Dengying Fm                            | 550.88 |
| China   | Junrongwan                | 163.00 | n/a    | 1.7 Jang et al. 2007                              | Dengying Fm                            | 550.83 |
| China   | Junrongwan                | 165.00 | n/a    | 5.86 Jang et al. 2007                             | Dengying Fm                            | 550.45 |
| China   | Junrongwan                | 170.00 | n/a    | 5.86 Jang et al. 2007                             | Dengying Fm                            | 550.20 |
| China   | Junrongwan                | 172.00 | n/a    | 6.85 Jang et al. 2007                             | Dengying Fm                            | 550.98 |
| China   | Junrongwan                | 176.00 | n/a    | 4.8 Jang et al. 2007                              | Dengying Fm                            | 549.83 |
| China   | Junrongwan                | 179.00 | n/a    | 4.38 Jang et al. 2007                             | Dengying Fm                            | 549.85 |
| China   | Junrongwan                | 182.00 | n/a    | 4.02 Jang et al. 2007                             | Dengying Fm                            | 549.47 |
| China   | Junrongwan                | 185.00 | n/a    | 3.79 Jang et al. 2007                             | Dengying Fm                            | 549.28 |
| China   | Junrongwan                | 189.00 | n/a    | 4.12 Jang et al. 2007                             | Dengying Fm                            | 549.04 |
| China   | Junrongwan                | 192.00 | n/a    | 4.01 Jang et al. 2007                             | Dengying Fm                            | 548.85 |
| China   | Junrongwan                | 195.00 | n/a    | 3.38 Jang et al. 2007                             | Dengying Fm                            | 548.67 |
| China   | Junrongwan                | 199.00 | n/a    | 4.17 Jang et al. 2007                             | Dengying Fm                            | 548.42 |
| China   | Junrongwan                | 203.00 | n/a    | 4.3 Jang et al. 2007                              | Dengying Fm                            | 548.18 |
| China   | Junrongwan                | 205.00 | n/a    | 4.11 Jang et al. 2007                             | Dengying Fm                            | 548.06 |
| China   | Junrongwan                | 208.00 | n/a    | 1.68 Jang et al. 2007                             | Dengying Fm                            | 547.87 |
| China   | Junrongwan                | 211.00 | n/a    | 3.15 Jang et al. 2007                             | Dengying Fm                            | 547.69 |
| China   | Junrongwan                | 215.00 | n/a    | 2.7 Jang et al. 2007                              | Dengying Fm                            | 547.44 |
| China   | Shipai section            | 217.00 | n/a    | 3.95 Jang et al. 2007                             | Dengying Fm                            | 547.32 |
| China   | Shipai section            | 218.60 | n/a    | 1.617 Jang et al. 2007                            | Dengying Fm                            | 547.29 |
| China   | Shipai section            | 223.80 | n/a    | 2.632 Jang et al. 2007                            | Dengying Fm                            | 547.10 |
| China   | Shipai section            | 241.10 | n/a    | 2.299 Jang et al. 2007                            | Dengying Fm                            | 546.90 |
| China   | Shipai section            | 253.80 | n/a    | 0.879 Jang et al. 2007                            | Dengying Fm                            | 546.87 |
| China   | Shipai section            | 265.20 | n/a    | 1.932 Jang et al. 2007                            | Dengying Fm                            | 546.47 |
| China   | Shipai section            | 281.20 | n/a    | 2.688 Jang et al. 2007                            | Dengying Fm                            | 546.19 |
| China   | Shipai section            | 281.30 | n/a    | 2.784 Jang et al. 2007                            | Dengying Fm                            | 546.19 |
| China   | Shipai section            | 288.40 | n/a    | 2.007 Jang et al. 2007                            | Dengying Fm                            | 546.07 |
| China   | Shipai section            | 307.90 | n/a    | 1.649 Jang et al. 2007                            | Dengying Fm                            | 545.72 |
| China   | Shipai section            | 331.20 | n/a    | 1.329 Jang et al. 2007                            | Dengying Fm                            | 545.31 |
| China   | Shipai section            | 338.10 | n/a    | 3.328 Jang et al. 2007                            | Dengying Fm                            | 545.19 |
| China   | Shipai section            | 345.00 | n/a    | 4.118 Jang et al. 2007                            | Dengying Fm                            | 545.07 |
| China   | Shipai section            | 350.80 | n/a    | 5.258 Jang et al. 2007                            | Dengying Fm                            | 544.97 |
| China   | Shipai section            | 356.20 | n/a    | 3.244 Jang et al. 2007                            | Dengying Fm                            | 544.88 |
| China   | Shipai section            | 362.90 | n/a    | 4.201 Jang et al. 2007                            | Dengying Fm                            | 544.76 |
| China   | Shipai section            | 367.30 | n/a    | 3.386 Jang et al. 2007                            | Dengying Fm                            | 544.68 |
| China   | Shipai section            | 372.90 | n/a    | 4.016 Jang et al. 2007                            | Dengying Fm                            | 544.58 |
| China   | Shipai section            | 376.20 | n/a    | 3.278 Jang et al. 2007                            | Dengying Fm                            | 544.45 |
| China   | Shipai section            | 383.80 | n/a    | 3.184 Jang et al. 2007                            | Dengying Fm                            | 544.39 |
| China   | Shipai section            | 390.80 | n/a    | 3.117 Jang et al. 2007                            | Dengying Fm                            | 544.27 |
| China   | Shipai section            | 396.10 | n/a    | 3.038 Jang et al. 2007                            | Dengying Fm                            | 544.14 |
| China   | Shipai section            | 403.00 | n/a    | 3.017 Jang et al. 2007                            | Dengying Fm                            | 544.05 |
| China   | Shipai section            | 408.20 | n/a    | 3.013 Jang et al. 2007                            | Dengying Fm                            | 543.98 |
| China   | Shipai section            | 414.20 | n/a    | 2.025 Jang et al. 2007                            | Dengying Fm                            | 543.86 |
| China   | Shipai section            | 419.90 | n/a    | 4.76 Jang et al. 2007                             | Dengying Fm                            | 543.76 |
| China   | Shipai section            | 426.40 | n/a    | 1.07 Jang et al. 2007                             | Dengying Fm                            | 543.59 |
| China   | Shipai section            | 436.80 | n/a    | 3.013 Jang et al. 2007                            | Dengying Fm                            | 543.46 |
| China   | Shipai section            | 447.50 | n/a    | 3.493 Jang et al. 2007                            | Dengying Fm                            | 543.27 |
| China   | Shipai section            | 456.70 | n/a    | 2.42 Jang et al. 2007                             | Dengying Fm                            | 543.11 |
| China   | Shipai section            | 464.00 | n/a    | 1.621 Jang et al. 2007                            | Dengying Fm                            | 542.98 |
| China   | Shipai section            | 470.00 | n/a    | 1.08 Jang et al. 2007                             | Dengying Fm                            | 542.88 |
| China   | Shipai section            | 476.00 | n/a    | 1.413 Jang et al. 2007                            | Dengying Fm                            | 542.77 |
| China   | Shipai section            | 482.20 | n/a    | 2.896 Jang et al. 2007                            | Dengying Fm                            | 542.66 |
| China   | Shipai section            | 490.00 | n/a    | 1.156 Jang et al. 2007                            | Dengying Fm                            | 542.53 |
| China   | Shipai section            | 497.60 | n/a    | 2.894 Jang et al. 2007                            | Dengying Fm                            | 542.39 |
| China   | Shipai section            | 508.50 | n/a    | 2.472 Jang et al. 2007                            | Dengying Fm                            | 542.24 |
| China   | Shipai section            | 515.60 | n/a    | 2.063 Jang et al. 2007                            | Dengying Fm                            | 542.08 |
| China   | Shipai section            | 531.50 | n/a    | 2.282 Jang et al. 2007                            | Dengying Fm                            | 541.80 |
| China   | Shipai section            | 545.20 | n/a    | 2.733 Jang et al. 2007                            | Dengying Fm                            | 541.56 |
| China   | Shipai section            | 551.90 | n/a    | 2.764 Jang et al. 2007                            | Dengying Fm                            | 541.44 |
| China   | Shipai section            | 558.20 | n/a    | 1.552 Jang et al. 2007                            | Dengying Fm                            | 541.33 |
| China   | Shipai section            | 565.20 | n/a    | 2.961 Jang et al. 2007                            | Dengying Fm                            | 541.21 |
| China   | Shipai section            | 572.20 | n/a    | 2.528 Jang et al. 2007                            | Dengying Fm                            | 541.08 |
| China   | Shipai section            | 578.10 | n/a    | 1.52 Jang et al. 2007                             | Dengying Fm                            | 540.98 |
| China   | Shipai section            | 584.30 | n/a    | 1.85 Jang et al. 2007                             | Dengying Fm                            | 540.87 |
| China   | Shipai section            | 590.00 | n/a    | 2.84 Jang et al. 2007                             | Dengying Fm                            | 540.77 |
| China   | Shipai section            | 594.00 | n/a    | 3.113 Jang et al. 2007                            | Dengying Fm                            | 540.70 |
| China   | Shipai section            | 603.80 | n/a    | 2.965 Jang et al. 2007                            | Dengying Fm                            | 540.62 |
| China   | Shipai section            | 608.80 | n/a    | 2.791 Jang et al. 2007                            | Dengying Fm                            | 540.53 |
| China   | Shipai section            | 607.20 | n/a    | 2.687 Jang et al. 2007                            | Dengying Fm                            | 540.47 |
| China   | Shipai section            | 612.30 | n/a    | 2.586 Jang et al. 2007                            | Dengying Fm                            | 540.38 |
| China   | Shipai section            | 621.80 | n/a    | 3.033 Jang et al. 2007                            | Dengying Fm                            | 540.21 |
| China   | Shipai section            | 643.50 | n/a    | 2.541 Jang et al. 2007                            | Dengying Fm                            | 539.83 |
| China   | Shipai section            | 652.00 | n/a    | 3.033 Jang et al. 2007                            | Dengying Fm                            | 539.68 |
| China   | Shipai section            | 661.00 | n/a    | 2.873 Jang et al. 2007                            | Dengying Fm                            | 539.52 |
| China   | Shipai section            | 670.00 | n/a    | 3.179 Jang et al. 2007                            | Dengying Fm                            | 539.37 |
| China   | Shipai section            | 676.00 | n/a    | 2.472 Jang et al. 2007                            | Dengying Fm                            | 539.23 |
| China   | Shipai section            | 686.00 | n/a    | 0.09 Jang et al. 2007                             | Dengying Fm                            | 539.08 |
| China   | Shipai section            | 694.20 | n/a    | -0.144 Jang et al. 2007                           | Dengying Fm                            | 538.94 |
| China   | Shipai section            | 707.90 | n/a    | -0.576 Jang et al. 2007                           | Dengying Fm                            | 538.7  |
| Brazil  | Laginha Mine western base | 0.00   | n/a    | Boggiani et al. 2010                              | Tamengo Fm                             | 555.18 |
| Brazil  | Laginha Mine western base | 0.70   | n/a    | -3.64 Boggiani et al. 2010                        | Tamengo Fm                             | 554.99 |
| Brazil  | Laginha Mine western base | 2.10   | n/a    | -0.23 Boggiani et al. 2010                        | Tamengo Fm                             | 554.57 |
| Brazil  | Laginha Mine western base | 3.20   | n/a    | -1.11 Boggiani et al. 2010                        | Tamengo Fm                             | 554.28 |
| Brazil  | Laginha Mine western base | 4.80   | n/a    | -0.71 Boggiani et al. 2010                        | Tamengo Fm                             | 553.82 |
| Brazil  | Laginha Mine western base | 7.00   | n/a    | -0.58 Boggiani et al. 2010                        | Tamengo Fm                             | 553.18 |
| Brazil  | Laginha Mine western base | 8.30   | n/a    | -0.43 Boggiani et al. 2010                        | Tamengo Fm                             | 552.82 |
| Brazil  | Laginha Mine western base | 8.90   | n/a    | -1.12 Boggiani et al. 2010                        | Tamengo Fm                             | 552.66 |
| Brazil  | Laginha Mine western base | 11.00  | n/a    | -0.31 Boggiani et al. 2010                        | Tamengo Fm                             | 552.05 |
| Brazil  | Laginha Mine western base | 12.40  | n/a    | -0.29 Boggiani et al. 2010                        | Tamengo Fm                             | 551.66 |
| Brazil  | Laginha Mine western base | 14.40  | n/a    | -0.4 Boggiani et al. 2010                         | Tamengo Fm                             | 551.07 |
| Brazil  | Laginha Mine western base | 15.50  | n/a    | -1.38 Boggiani et al. 2010                        | Tamengo Fm                             | 550.76 |
| Brazil  | Laginha Mine western base | 17.30  | n/a    | -0.95 Boggiani et al. 2010                        | Tamengo Fm                             | 550.26 |
| Brazil  | Laginha Mine western base | 18.20  | n/a    | -1.46 Boggiani et al. 2010                        | Tamengo Fm                             | 549.71 |
| Brazil  | Laginha Mine western base | 20.00  | n/a    | -0.32 Boggiani et al. 2010                        | Tamengo Fm                             | 549.48 |
| Brazil  | Laginha Mine western base | 20.40  | n/a    | -1.13 Boggiani et al. 2010                        | Tamengo Fm                             | 549.37 |
| Brazil  | Laginha Mine western base | 22.00  | n/a    | 1.07 Boggiani et al. 2010                         | Tamengo Fm                             | 548.91 |
| Brazil  | Laginha Mine western base | 22.60  | n/a    | 0.27 Boggiani et al. 2010                         | Tamengo Fm                             | 548.76 |
| Brazil  | Laginha Mine western base | 23.30  | n/a    | -1.1 Boggiani et al. 2010                         | Tamengo Fm                             | 548.56 |
| Brazil  | Laginha Mine western base | 23.60  | n/a    | 0.42 Boggiani et al. 2010                         | Tamengo Fm                             | 548.46 |
| Brazil  | Laginha Mine western base | 24.80  | n/a    | -1.28 Boggiani et al. 2010                        | Tamengo Fm                             | 548.17 |
| Brazil  | Laginha Mine western base | 25.80  | n/a    | -1.34 Boggiani et al. 2010                        | Tamengo Fm                             | 547.88 |
| Brazil  | Laginha Mine western base | 27.20  | n/a    | -1.35 Boggiani et al. 2010                        | Tamengo Fm                             | 547.45 |
| Brazil  | Laginha Mine western base | 27.30  | n/a    | 4.59 Boggiani et al. 2010                         | Tamengo Fm                             | 547.42 |
| Brazil  | Laginha Mine western base | 28.50  | n/a    | -1.51 Boggiani et al. 2010                        | Tamengo Fm                             | 547.08 |
| Brazil  | Laginha Mine western base | 30.20  | n/a    | -1.89 Boggiani et al. 2010                        | Tamengo Fm                             | 546.57 |
| Brazil  | Laginha Mine western base | 31.50  | n/a    | -1.1 Boggiani et al. 2010                         | Tamengo Fm                             | 546.23 |
| Brazil  | Laginha Mine western base | 32.00  | n/a    | 1.3 Boggiani et al. 2010                          | Tamengo Fm                             | 546.08 |
| Brazil  | Laginha Mine western base | 33.00  | n/a    | -0.36 Boggiani et al. 2010                        | Tamengo Fm                             | 545.79 |
| Brazil  | Laginha Mine western base | 36.20  | n/a    | 0.45 Boggiani et al. 2010                         | Tamengo Fm                             | 544.88 |
| Brazil  | Laginha Mine western base | 37.00  | n/a    | 0.13 Boggiani et al. 2010                         | Tamengo Fm                             | 544.64 |
| Brazil  | Laginha Mine western base | 38.30  | n/a    | 0.97 Boggiani et al. 2010                         | Tamengo Fm                             | 544.29 |
| Brazil  | Laginha Mine western base | 39.40  | n/a    | -0.56 Boggiani et al. 2010                        | Tamengo Fm                             | 543.98 |
| Brazil  | Laginha Mine western base | 40.40  | n/a    | 0.34 Boggiani et al. 2010                         | Tamengo Fm                             | 543.88 |
| Brazil  | Laginha Mine western base | 42.60  | n/a    | 0.58 Boggiani et al. 2010                         | Tamengo Fm                             | 543.07 |
| Brazil  | Laginha Mine western base | 44.00  | n/a    | 0.54 Boggiani et al. 2010                         | Tamengo Fm                             | 542.65 |
| Brazil  | Laginha Mine western      | 45.00  | n/a    | 1.87 Boggiani et al. 2010                         | Tamengo Fm                             | 542.37 |
| Brazil  | Laginha Mine western      | 45.40  | n/a    | 3.18 Boggiani et al. 2010                         | Tamengo Fm                             | 542.36 |
| Brazil  | Laginha Mine western      | 50.40  | n/a    | 2.6 Boggiani et al. 2010                          | Tamengo Fm                             | 542.25 |
| Brazil  | Laginha Mine western      | 52.80  | n/a    | 3.15 Boggiani et al. 2010                         | Tamengo Fm                             | 542.20 |
| Brazil  | Laginha Mine western      | 57.20  | n/a    | 3.11 Boggiani et al. 2010                         | Tamengo Fm                             | 542.10 |
| Brazil  | Laginha Mine western      | 58.70  | n/a    | 1.39 Boggiani et al. 2010                         | Tamengo Fm                             | 542.04 |
| Brazil  | Laginha Mine western      | 68.40  | n/a    | 2.75 Boggiani et al. 2010                         | Tamengo Fm                             | 541.85 |
| Nambija | Southern sub-basin        | 0.00   | n/a    | Saylor et al. 1998, digitized from figure 20      | Kaines Member                          | 550    |
| Nambija | Southern sub-basin        | 55.00  | n/a    | -1.4 Saylor et al. 1998, digitized from figure 20 | Kaines Member                          | 549.43 |
| Nambija | Southern sub-basin        | 65.00  | n/a    | -3.8 Saylor et al. 1998, digitized from figure 20 | Kaines Member                          | 549.40 |
| Nambija | Southern sub-basin        | 66.00  | n/a    | -3.6 Saylor et al. 1998, digitized from figure 20 | Mara Member                            | 549.29 |
| Nambija | Southern sub-basin        | 68.00  | n/a    | -2.1 Saylor et al. 1998, digitized from figure 20 | Mara Member                            | 549.29 |
| Nambija | Southern sub-basin        | 72.00  | n/a    | -2.7 Saylor et al. 1998, digitized from figure 20 | Mara Member                            | 549.20 |
| Nambija | Southern sub-basin        | 92.00  | n/a    | -2.7 Saylor et al. 1998, digitized from figure 20 | Mara Member                            | 549.03 |
| Nambija | Southern sub-basin        | 86.00  | n/a    | -1.6 Saylor et al. 1998, digitized from figure 20 | Mara Member                            | 548.97 |
| Nambija | Southern sub-basin        | 92.00  | n/a    | -3.7 Saylor et al. 1998, digitized from figure 20 | Kilbuck Member                         | 548.60 |
| Nambija | Southern sub-basin        | 164.00 | n/a    | 2.4 Saylor et al. 1998, digitized from figure 20  | Moolfontein Member                     | 548.30 |
| Nambija | Southern sub-basin        | 1      |        |                                                   |                                        |        |

|         |                    |         |     |                                                  |                  |        |
|---------|--------------------|---------|-----|--------------------------------------------------|------------------|--------|
| Namibia | Southern sub-basin | 958.00  | n/a | 1.8 Saylor et al. 1998, digitized from figure 2D | Spitzkopf Member | 540.04 |
| Namibia | Southern sub-basin | 972.00  | n/a | 2.5 Saylor et al. 1998, digitized from figure 2D | Spitzkopf Member | 540.00 |
| Namibia | Southern sub-basin | 889.00  | n/a | 2.1 Saylor et al. 1998, digitized from figure 2D | Spitzkopf Member | 539.94 |
| Namibia | Southern sub-basin | 1009.00 | n/a | 2.1 Saylor et al. 1998, digitized from figure 2D | Spitzkopf Member | 539.88 |
| Namibia | Southern sub-basin | 1022.00 | n/a | 1.8 Saylor et al. 1998, digitized from figure 2D | Spitzkopf Member | 539.84 |
| Namibia | Southern sub-basin | 1033.00 | n/a | 1.8 Saylor et al. 1998, digitized from figure 2D | Spitzkopf Member | 539.80 |
| Namibia | Southern sub-basin | 1055.00 | n/a | 1.5 Saylor et al. 1998, digitized from figure 2D | Spitzkopf Member | 539.73 |
| Namibia | Southern sub-basin | 1063.00 | n/a | 2.1 Saylor et al. 1998, digitized from figure 2D | Spitzkopf Member | 539.70 |
| Namibia | Southern sub-basin | 1077.00 | n/a | 1.1 Saylor et al. 1998, digitized from figure 2D | Spitzkopf Member | 539.66 |
| Namibia | Southern sub-basin | 1086.00 | n/a | 1.5 Saylor et al. 1998, digitized from figure 2D | Spitzkopf Member | 539.62 |
| Namibia | Southern sub-basin | 1114.00 | n/a | 1.8 Saylor et al. 1998, digitized from figure 2D | Spitzkopf Member | 539.54 |
| Namibia | Southern sub-basin | 1186.00 | n/a | 1 Saylor et al. 1998, digitized from figure 2D   | Spitzkopf Member | 539.30 |
| Namibia | Southern sub-basin | 1197.00 | n/a | 2 Saylor et al. 1998, digitized from figure 2D   | Spitzkopf Member | 539.27 |
| Namibia | Southern sub-basin | 1204.00 | n/a | 1.6 Saylor et al. 1998, digitized from figure 2D | Spitzkopf Member | 539.24 |
| Namibia | Southern sub-basin | 1276.00 | n/a | 1.2 Saylor et al. 1998, digitized from figure 2D | Spitzkopf Member | 539.01 |
| Namibia | Southern sub-basin | 1282.00 | n/a | -1 Saylor et al. 1998, digitized from figure 2D  | Spitzkopf Member | 538.99 |
| Namibia | Southern sub-basin | 1289.00 | n/a | 1 Saylor et al. 1998, digitized from figure 2D   | Spitzkopf Member | 538.97 |
| Namibia | Southern sub-basin | 1293.00 | n/a | 1.6 Saylor et al. 1998, digitized from figure 2D | Spitzkopf Member | 538.95 |
| Namibia | Southern sub-basin | 1304.00 | n/a | 1 Saylor et al. 1998, digitized from figure 2D   | Spitzkopf Member | 538.92 |
| Namibia | Southern sub-basin | 1317.00 | n/a | 1.4 Saylor et al. 1998, digitized from figure 2D | Spitzkopf Member | 538.87 |
| Namibia | Southern sub-basin | 1324.00 | n/a | 0.9 Saylor et al. 1998, digitized from figure 2D | Spitzkopf Member | 538.85 |
| Namibia | Southern sub-basin | 1346.00 | n/a | 0.9 Saylor et al. 1998, digitized from figure 2D | Spitzkopf Member | 538.78 |
| Namibia | Southern sub-basin | 1352.00 | n/a | 1.6 Saylor et al. 1998, digitized from figure 2D | Spitzkopf Member | 538.76 |
| Namibia | Southern sub-basin | 1376.00 | n/a | 0 Saylor et al. 1998, digitized from figure 2D   | Spitzkopf Member | 538.68 |
| Namibia | Southern sub-basin | 1376.00 | n/a | 1.2 Saylor et al. 1998, digitized from figure 2D | Spitzkopf Member | 538.68 |
| Namibia | Southern sub-basin | 1385.00 | n/a | 0.7 Saylor et al. 1998, digitized from figure 2D | Spitzkopf Member | 538.65 |
| Namibia | Southern sub-basin | 1396.00 | n/a | 1.9 Saylor et al. 1998, digitized from figure 2D | Spitzkopf Member | 538.62 |
| Namibia | Southern sub-basin | 1396.00 | n/a | 0.7 Saylor et al. 1998, digitized from figure 2D | Spitzkopf Member | 538.61 |
| Namibia | Southern sub-basin | 1407.00 | n/a | 1.2 Saylor et al. 1998, digitized from figure 2D | Spitzkopf Member | 538.58 |
| Namibia |                    |         | n/a |                                                  | Normtas Fm       | 538.58 |

Normtas Fm ash, Namibia, Southern subbasin,  
+2.013C per mille plateau. Dated by U-Pb TIMS  
on zircon by Linnemann et al. 2018

Table S2: Re and Os elemental abundance and isotopic composition data for isochron regressions

| Sample | Isochron               | Re (ng/g) | ±      | Os (pg/g) | ±    | <sup>182</sup> Os (pg/g) | ±   | <sup>187</sup> Re/ <sup>188</sup> Os | ±      | <sup>187</sup> Os/ <sup>188</sup> Os | ±      | rho <sup>a</sup> | Osi <sup>b</sup> |
|--------|------------------------|-----------|--------|-----------|------|--------------------------|-----|--------------------------------------|--------|--------------------------------------|--------|------------------|------------------|
| 30     | Well L                 | 41.345    | 0.118  | 909.1     | 9.3  | 239.8                    | 1.8 | 342.9918                             | 2.7299 | 4.4592                               | 0.0570 | 0.543            | 1.140            |
| 31     |                        | 159.444   | 0.393  | 3084.5    | 18.9 | 769.6                    | 2.6 | 412.1811                             | 1.7281 | 5.1469                               | 0.0247 | 0.572            | 1.159            |
| 32     |                        | 192.669   | 0.473  | 3625.8    | 22.5 | 896.0                    | 3.1 | 427.7917                             | 1.8078 | 5.2690                               | 0.0258 | 0.573            | 1.130            |
| 28     |                        | 163.530   | 0.400  | 2805.6    | 18.0 | 659.1                    | 2.3 | 493.6122                             | 2.0855 | 5.9341                               | 0.0290 | 0.576            | 1.158            |
| 34     |                        | 288.910   | 0.706  | 4805.7    | 31.8 | 1109.4                   | 3.9 | 518.0780                             | 2.2189 | 6.1712                               | 0.0315 | 0.567            | 1.158            |
| 27     |                        | 70.994    | 0.175  | 1128.5    | 7.6  | 253.7                    | 0.9 | 556.7242                             | 2.4284 | 6.5406                               | 0.0333 | 0.584            | 1.163            |
| 29     |                        | 260.549   | 0.636  | 3823.0    | 25.4 | 815.4                    | 2.8 | 635.7007                             | 2.6535 | 7.3007                               | 0.0350 | 0.575            | 1.150            |
| 26     |                        | 210.434   | 0.516  | 2880.3    | 20.6 | 583.7                    | 2.1 | 717.1764                             | 3.1518 | 8.0781                               | 0.0424 | 0.579            | 1.139            |
| A      | A1707                  | 1.397     | 0.005  | 160.7     | 0.8  | 59.2                     | 0.3 | 46.9540                              | 0.3075 | 1.0532                               | 0.0080 | 0.590            | 0.608            |
| B      | 64° 43' 10.0704" -140° | 3.883     | 0.012  | 79.8      | 0.5  | 22.0                     | 0.1 | 351.4028                             | 1.9460 | 3.9508                               | 0.0246 | 0.599            | 0.616            |
| C      | 2' 30.0834"            | 4.976     | 0.017  | 61.5      | 0.5  | 12.3                     | 0.1 | 802.7904                             | 5.4531 | 8.2357                               | 0.0618 | 0.676            | 0.616            |
| D      |                        | 2.311     | 0.008  | 43.6      | 0.3  | 11.6                     | 0.1 | 397.2155                             | 2.9232 | 4.3846                               | 0.0372 | 0.654            | 0.615            |
| E      |                        | 0.821     | 0.005  | 205.1     | 0.8  | 77.7                     | 0.3 | 21.0201                              | 0.1603 | 0.8132                               | 0.0050 | 0.404            | 0.614            |
| 1      | J1443                  | 0.643     | 0.003  | 85.6      | 0.3  | 31.8                     | 0.1 | 40.2820                              | 0.2510 | 0.9895                               | 0.0057 | 0.477            | 0.602            |
| 2      | 64° 5' 36.999" -132°   | 7.487     | 0.019  | 348.3     | 1.3  | 117.7                    | 1.2 | 126.4998                             | 1.3294 | 1.8232                               | 0.0187 | 0.967            | 0.608            |
| 3      | 13' 53.0004"           | 1.154     | 0.004  | 82.4      | 0.5  | 29.3                     | 0.2 | 78.3031                              | 0.5221 | 1.3591                               | 0.0122 | 0.554            | 0.607            |
| 4      |                        | 0.790     | 0.003  | 56.3      | 0.3  | 20.0                     | 0.1 | 78.5263                              | 0.4857 | 1.3630                               | 0.0087 | 0.544            | 0.609            |
| 5      |                        | 9.441     | 0.023  | 387.9     | 2.0  | 128.7                    | 0.5 | 145.9664                             | 0.6835 | 2.0024                               | 0.0117 | 0.581            | 0.600            |
| 3      | Well M                 | 86.7780   | 0.2128 | 3150.7    | 15.6 | 1014.9                   | 3.6 | 170.1028                             | 0.7336 | 2.2867                               | 0.0116 | 0.576            | 0.687            |
| 4      |                        | 41.7632   | 0.1039 | 1378.0    | 6.9  | 435.6                    | 1.5 | 190.7463                             | 0.8186 | 2.4739                               | 0.0123 | 0.575            | 0.680            |
| 5      |                        | 243.8726  | 0.5974 | 4703.2    | 27.9 | 1254.8                   | 4.4 | 386.6377                             | 1.6394 | 4.3239                               | 0.0213 | 0.574            | 0.687            |
| 6      |                        | 25.6715   | 0.0637 | 781.9     | 4.3  | 242.3                    | 0.9 | 210.7425                             | 0.9610 | 2.6731                               | 0.0147 | 0.584            | 0.691            |
| 7      |                        | 133.9473  | 0.3272 | 2250.8    | 14.0 | 560.5                    | 2.0 | 475.4030                             | 2.0213 | 5.1705                               | 0.0255 | 0.578            | 0.698            |
| 8      |                        | 166.7851  | 0.4081 | 3403.1    | 20.0 | 931.4                    | 3.3 | 356.2314                             | 1.5233 | 4.0248                               | 0.0202 | 0.572            | 0.674            |
| 1      | J1719                  | 0.738     | 0.002  | 50.6      | 0.3  | 17.9                     | 0.1 | 81.8245                              | 0.5768 | 1.3908                               | 0.0095 | 0.684            | 0.605            |
| 2      | 64° 50' 47.8026" -     | 1.104     | 0.004  | 61.4      | 0.3  | 21.3                     | 0.1 | 103.2652                             | 0.6476 | 1.5954                               | 0.0116 | 0.622            | 0.603            |
| 3      | 133° 0' 43.5564"       | 0.761     | 0.003  | 45.0      | 0.2  | 15.7                     | 0.1 | 96.3474                              | 0.7473 | 1.5345                               | 0.0116 | 0.653            | 0.609            |
| 4      |                        | 0.821     | 0.008  | 79.3      | 0.4  | 28.9                     | 0.1 | 56.5053                              | 0.8440 | 1.1432                               | 0.0081 | 0.559            | 0.600            |
| 5      |                        | 0.996     | 0.004  | 69.7      | 0.4  | 24.8                     | 0.1 | 80.0356                              | 0.5449 | 1.3700                               | 0.0098 | 0.553            | 0.601            |
| 6      |                        | 3.547     | 0.013  | 131.7     | 0.8  | 42.9                     | 0.2 | 164.6136                             | 1.0067 | 2.1850                               | 0.0152 | 0.576            | 0.603            |
| 7      |                        | 0.890     | 0.005  | 57.7      | 0.3  | 20.3                     | 0.1 | 87.0138                              | 0.9443 | 1.4346                               | 0.0098 | 0.762            | 0.599            |
| 8      |                        | 13.769    | 0.050  | 312.1     | 2.0  | 89.0                     | 0.4 | 307.6607                             | 1.7531 | 3.5544                               | 0.0222 | 0.548            | 0.598            |

Uncertainties are given as 2σ for <sup>187</sup>Re/<sup>188</sup>Os and <sup>187</sup>Os/<sup>188</sup>Os and <sup>182</sup>Os.

The uncertainty includes the 2 SE uncertainty for mass spectrometer analysis plus uncertainties for Os blank abundance and isotopic composition.

<sup>a</sup> Rho is the associated error correlation (Ludwig, 1980).

<sup>b</sup> Osi = initial <sup>187</sup>Os/<sup>188</sup>Os isotope ratio calculated at 578, 567, 575, 562 and 574 Ma.

| Sample                           | Locality                                                                                                     | Lithostratigraphy                                                                                | Age (Ma) ± 2s analytical ± 2s total | Age Type                             | Radiometric age details                                                                                                                                                                                                                                                                                                                                             | Reference            |
|----------------------------------|--------------------------------------------------------------------------------------------------------------|--------------------------------------------------------------------------------------------------|-------------------------------------|--------------------------------------|---------------------------------------------------------------------------------------------------------------------------------------------------------------------------------------------------------------------------------------------------------------------------------------------------------------------------------------------------------------------|----------------------|
| 175WART7 ash 6 volcanic ash bed  | Swartkloofberg section, Witputs Subbasin, Nama Basin, southern Namibia                                       | Nomtsas Fm, Nama Group                                                                           | 538.58 ± 0.19 ± 0.63                | <sup>206</sup> Pb/ <sup>238</sup> U  | Three of nine concordant single zircon analyses (excluding six older grains) combined to produce a weighted mean <sup>206</sup> Pb/ <sup>238</sup> U age, utilizing CA-TIMS and the EARTHIME 535 spike.                                                                                                                                                             | Lineman et al., 2019 |
| BB5 volcanic ash bed             | Oman (3045m depth, Birba-5 well)                                                                             | Ara Group, 1m above base of A4 carbonate unit                                                    | 541.00 ± 0.29 ± 0.63                | <sup>206</sup> Pb/ <sup>238</sup> U  | Eight concordant single zircon grain analyses combined to produce a weighted mean <sup>206</sup> Pb/ <sup>238</sup> U age, utilizing CA-TIMS and the EARTHIME 535 spike.                                                                                                                                                                                            | Bowring et al., 2007 |
| sample 1.04 volcanic ash bed     | Corcal, Corumbá - State of Mato Grosso do Sul, Brazil                                                        | top of Tamengo Formation, Corumba Group, southern Paraguay Belt                                  | 541.85 ± 0.77 ± 0.97                | <sup>206</sup> Pb/ <sup>238</sup> U  | Five of eleven concordant single zircon grain analyses (excluding six older grains) combined to produce a weighted mean <sup>206</sup> Pb/ <sup>238</sup> U age, utilizing CA-TIMS and the EARTHIME 535 spike.                                                                                                                                                      | Parry et al., 2017   |
| sample 1.08 volcanic ash bed     | Corcal, Corumbá - State of Mato Grosso do Sul, Brazil                                                        | top of Tamengo Formation, Corumba Group, southern Paraguay Belt                                  | 542.37 ± 0.32 ± 0.68                | <sup>206</sup> Pb/ <sup>238</sup> U  | Four of eight concordant single zircon grain analyses (excluding 1 older and 3 younger grains) combined to produce a weighted mean <sup>206</sup> Pb/ <sup>238</sup> U age, utilizing CA-TIMS and the EARTHIME 535 spike.                                                                                                                                           | Parry et al., 2017   |
| JIN04-2 volcanic ash bed         | Jijawan (Jiuquao) section, 17 km west of Maoping in Yangtze Gorges area, western Hubei Province, South China | top of Miaohu member black shale, uppermost Doushantuo Fm                                        | 551.09 ± 0.84 ± 1.02                | <sup>206</sup> Pb/ <sup>238</sup> U  | Sample JIN04-02 yields two concordant (of ten total) single zircon grain analyses with a weighted mean <sup>206</sup> Pb/ <sup>238</sup> U age of 551.09 ± 1.02 Ma. A corroborating weighted mean <sup>207</sup> Pb/ <sup>206</sup> Pb age of 548.09 ± 2.61 Ma is obtained from all ten zircons (recalculated using the U decay constant ratio of Mattinson, 2010). | Condon et al., 2005  |
| Porto Morrinhos tuff             | Porto Morrinhos - State of Mato Grosso do Sul, Brazil                                                        | Bocaina Formation, Corumba Group, southern Paraguay Belt                                         | 555.18 ± 0.34 ± 0.70                | <sup>206</sup> Pb/ <sup>238</sup> U  | Eight concordant single zircon grain analyses combined to produce a weighted mean <sup>206</sup> Pb/ <sup>238</sup> U age, utilizing CA-TIMS and the EARTHIME 535 spike.                                                                                                                                                                                            | Parry et al., 2017   |
| volcanic ash bed, sample NoP-0.9 | North Point, St. Mary's Bay, Avalon Peninsula, Newfoundland                                                  | post-glacial strata; basal Drook Formation, 0.9 m above the Gaskiers Formation; Conception Group | 579.88 ± 0.52 ± 0.81                | <sup>206</sup> Pb/ <sup>238</sup> U  | Five single zircon grains combined to produce a weighted mean <sup>206</sup> Pb/ <sup>238</sup> U age, utilizing CA-TIMS and the EARTHIME 535 spike.                                                                                                                                                                                                                | Pu et al., 2016      |
| 7527 volcanic ash bed            | Wangjiagou section in the Zhangcunping area, Yichang, Hubei Province, South China                            | between beds 3 and 4, below erosional unconformity in middle Doushantuo Fm                       | 614.00 ± 9.00 ± 9.00                | <sup>206</sup> Pb/ <sup>238</sup> U  | SHRIMP II ion probe analyses of 18 zircon grains yield a weighted mean <sup>206</sup> Pb/ <sup>238</sup> U age of 614.0 ± 9.0 Ma, [95% conf. int. including geologic scatter and an assumed 1% error in the TEMORA standardization].                                                                                                                                | Liu et al., 2009     |
| Sp8                              | Mackenzie Mountains, NW Canada                                                                               | Sheepbed Formation, 0.9m above contact with Hayhook Limestone Formation                          | 632.30 ± 3.4 ± 5.9                  | <sup>187</sup> Re/ <sup>187</sup> Os | Re-Os isochron age from organic-rich carbonaceous mudstones. Regressed using isochron V4.15 and includes the uncertainty in the <sup>187</sup> Re decay constant from the Smoliar et al. (1996) paper.                                                                                                                                                              | Rooney et al., 2015  |
| YG04-2 volcanic ash bed          | Jijawan (Jiuquao) section, 17 km west of Maoping in Yangtze Gorges area, western Hubei Province, South China | 9.5m above base of Doushantuo Fm, 5m above top of Lower Dolomite Member (Nantuo Cap Carbonate)   | 632.48 ± 0.84 ± 1.02                | <sup>206</sup> Pb/ <sup>238</sup> U  | Three concordant (of nine total) single zircon grain analyses have a weighted mean <sup>206</sup> Pb/ <sup>238</sup> U age of 632.48 ± 1.02 Ma. A corroborating weighted mean <sup>207</sup> Pb/ <sup>206</sup> Pb age of 629.97 ± 2.83 Ma is obtained from all nine zircons (recalculated using the U decay constant ratio of Mattinson, 2010).                    | Condon et al., 2005  |
| YG04-15 volcanic ash bed         | Wuhe-Gaojiaxi section, south of Sandouping in Yangtze Gorges area, western Hubei Province, South China       | 2.3m above base of Doushantuo Fm, within the Lower Dolomite Member (cap carbonate)               | 635.26 ± 0.84 ± 1.07                | <sup>206</sup> Pb/ <sup>238</sup> U  | Three concordant (of 18 total) single zircon grain analyses have a weighted mean <sup>206</sup> Pb/ <sup>238</sup> U age of 635.26 ± 1.07 Ma. A corroborating weighted mean <sup>207</sup> Pb/ <sup>206</sup> Pb age of 632.85 ± 2.82 Ma is obtained from 11 zircons (recalculated using the U decay constant ratio of Mattinson, 2010).                            | Condon et al., 2005  |
